# Supplementary material for: Microwave-accelerated and efficient synthesis of structurally diverse N-(2,2-diphenylvinyl)-β-oxoamides
Source: Royal Society of Chemistry journal article supplement (doi:10.1039/d1ob01359a), 2021-01-01

Supporting Information

**Microwave-accelerated and efficient synthesis of structurally diverse  
*N*-(2,2-diphenylvinyl)- $\beta$ -oxoamides**

Xingpeng Chen,<sup>a,b</sup> Yelong Lei,<sup>a</sup> Duo Fu,<sup>a</sup> and Jiayi Xu\*,<sup>a</sup>

<sup>a</sup> State Key Laboratory of Chemical Resource Engineering, Department of Organic Chemistry,  
College of Chemistry, Beijing University of Chemical Technology, Beijing 100029, China

<sup>b</sup> China Tianchen Engineering Corporation, Tianjin 300400, China

Fax/Tel: +86 10 64435565; E-mail: [jxxu@mail.buct.edu.cn](mailto:jxxu@mail.buct.edu.cn)

Content

Copies of NMR Spectra of products **2**, **3**, **5**, **6**, **7**, and **8**.....S2

## Copies of NMR Spectra of products 2, 3, 5, 6, 7, and 8

$^1\text{H}$  NMR (400 MHz) and  $^{13}\text{C}$  NMR (101 MHz) in  $\text{CDCl}_3$

$^1\text{H}$  and  $^{13}\text{C}$  NMR of compound **2a**

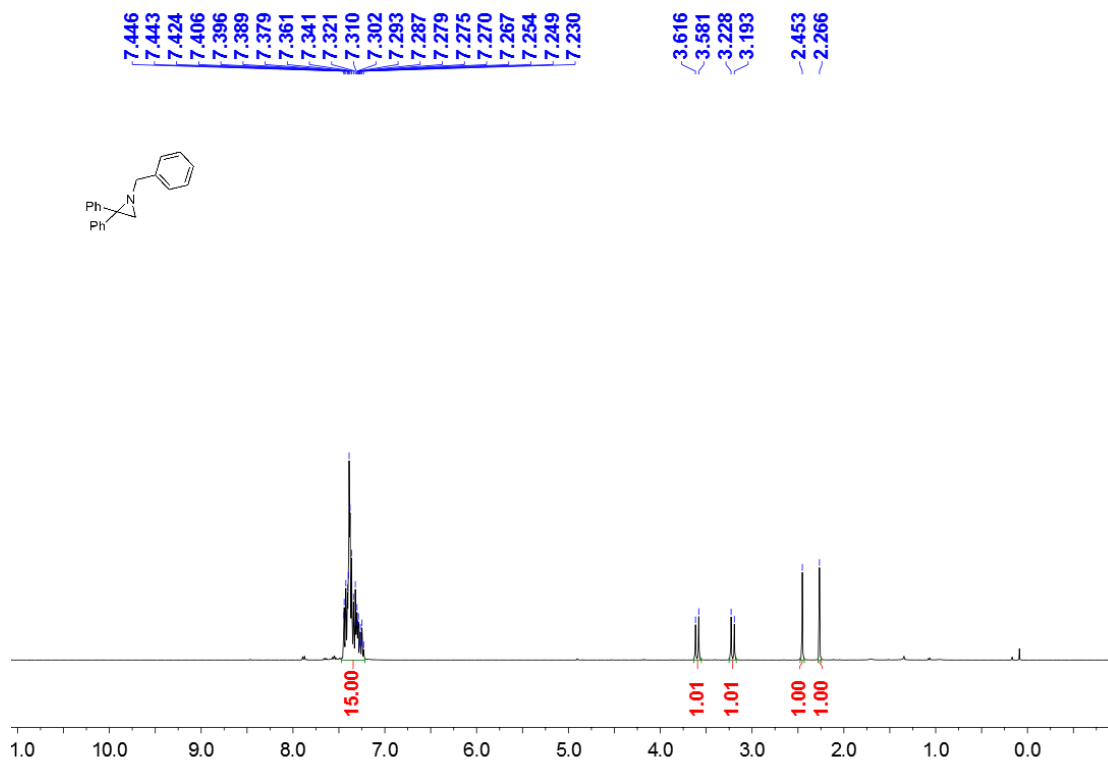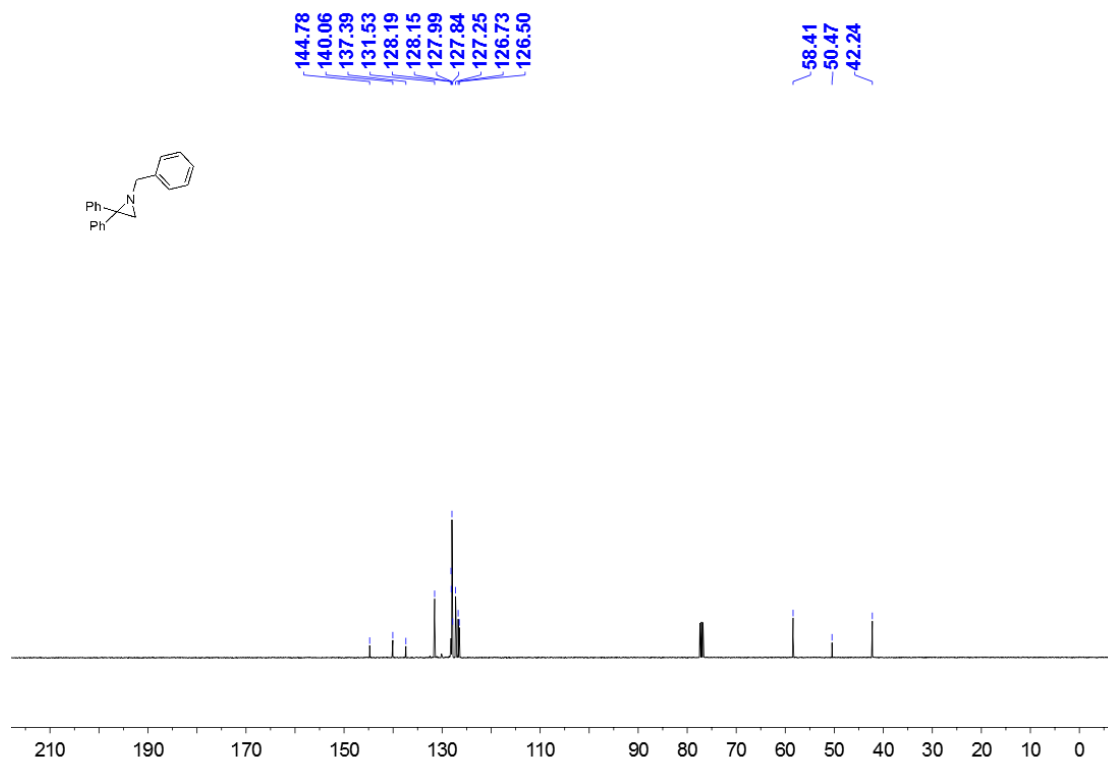

$^1\text{H}$  and  $^{13}\text{C}$  NMR of compound **2b**

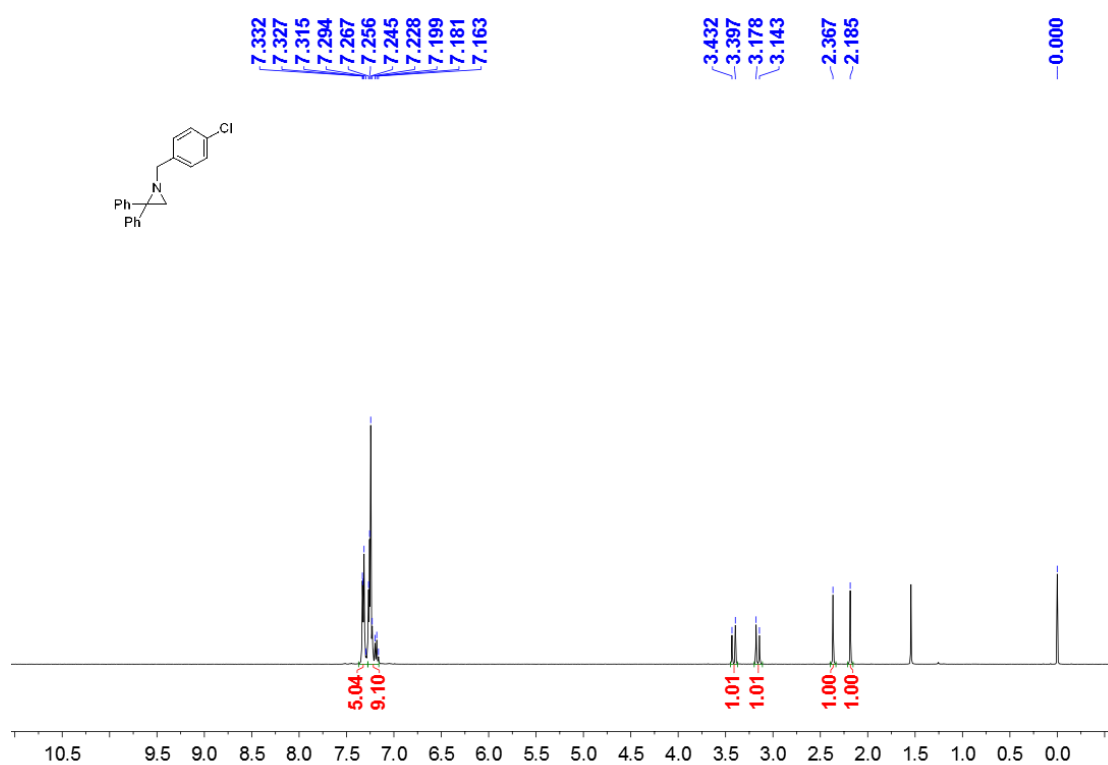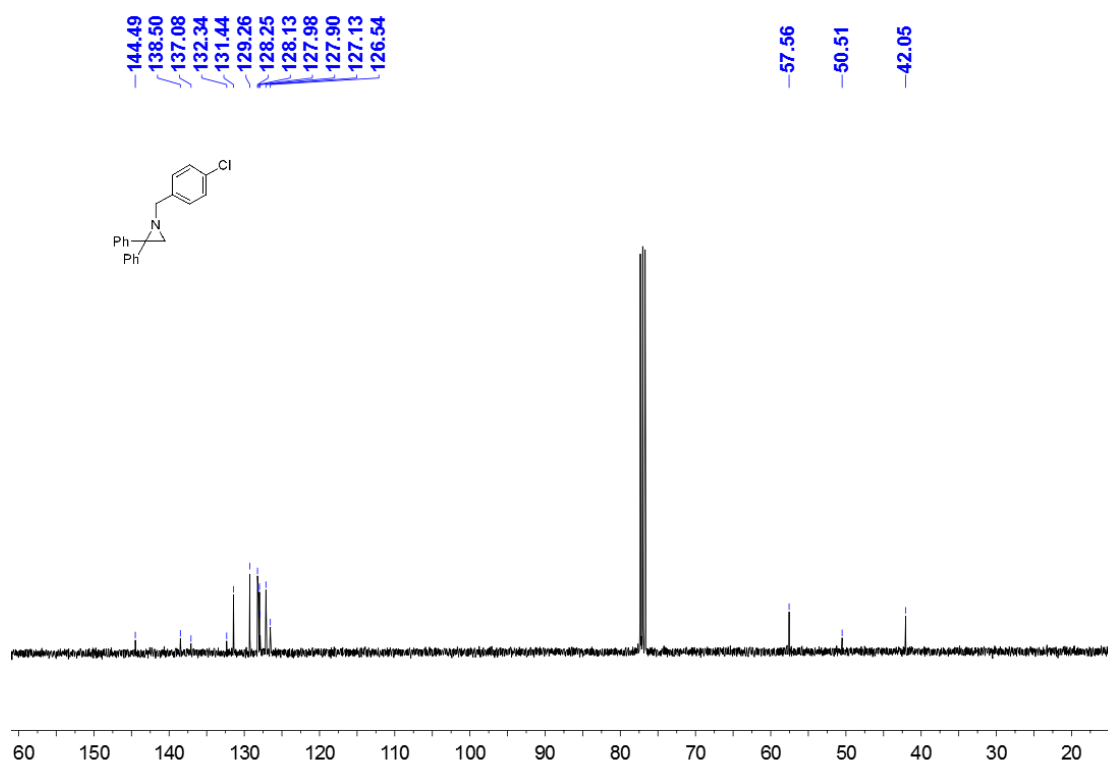

$^1\text{H}$  and  $^{13}\text{C}$  NMR of compound **2c**

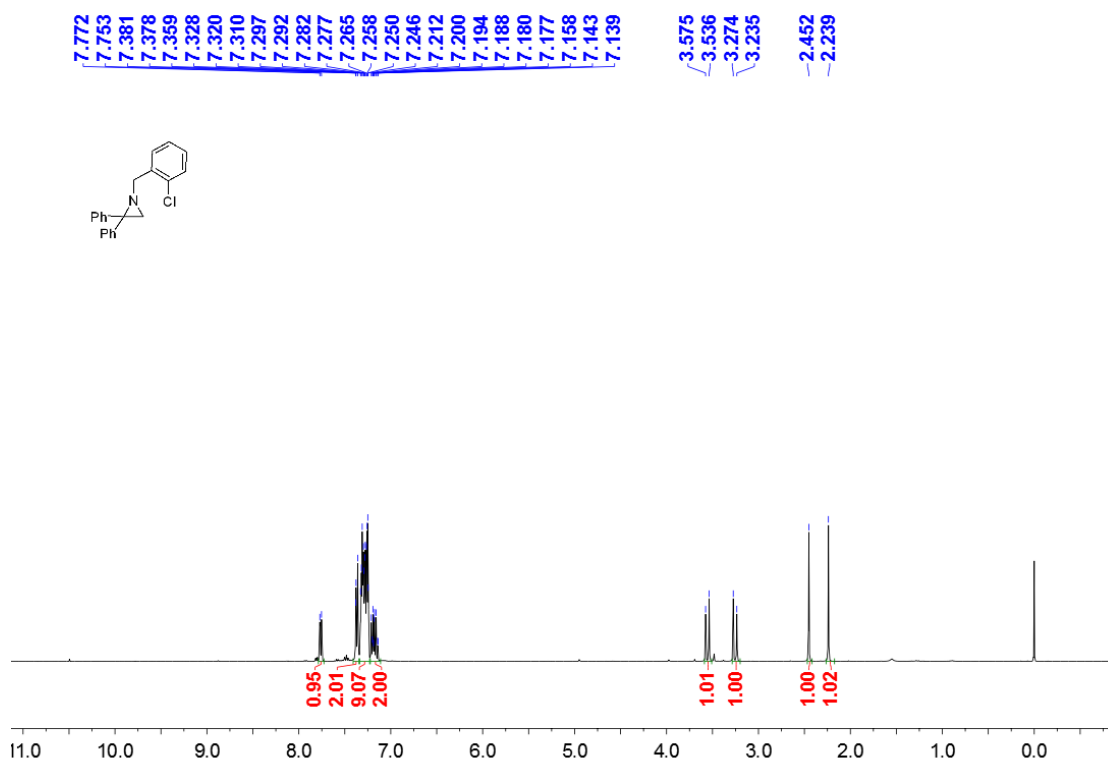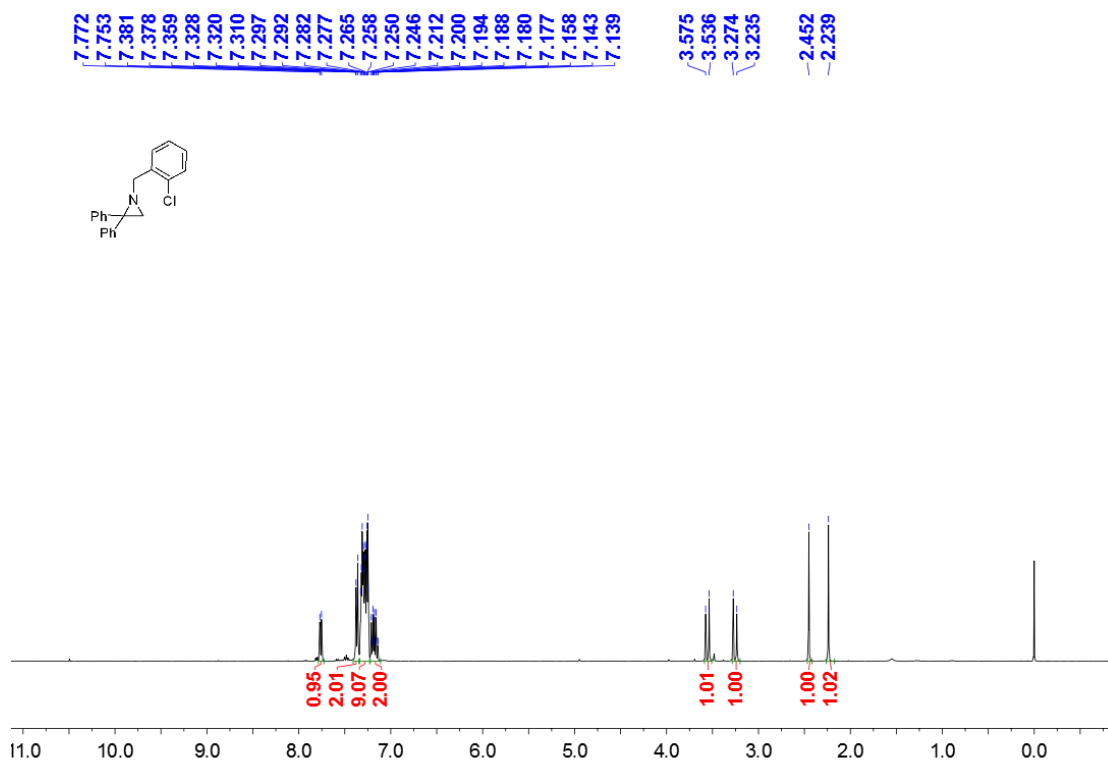

$^1\text{H}$  and  $^{13}\text{C}$  NMR of compound **2d**

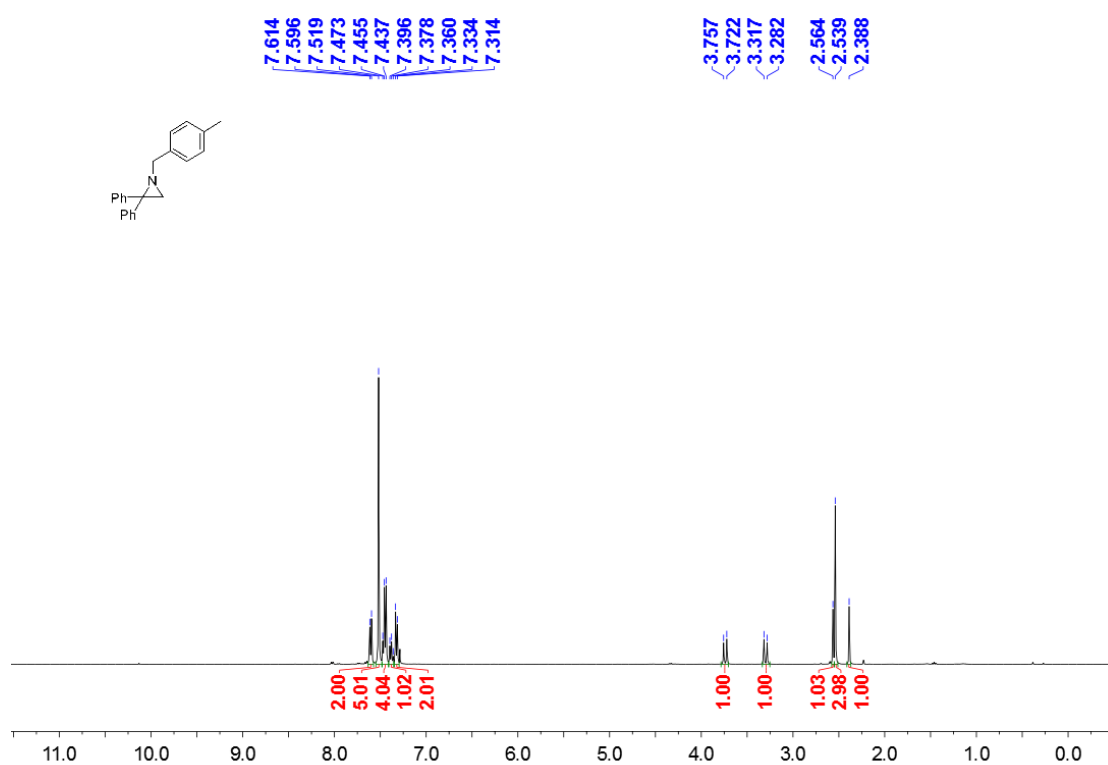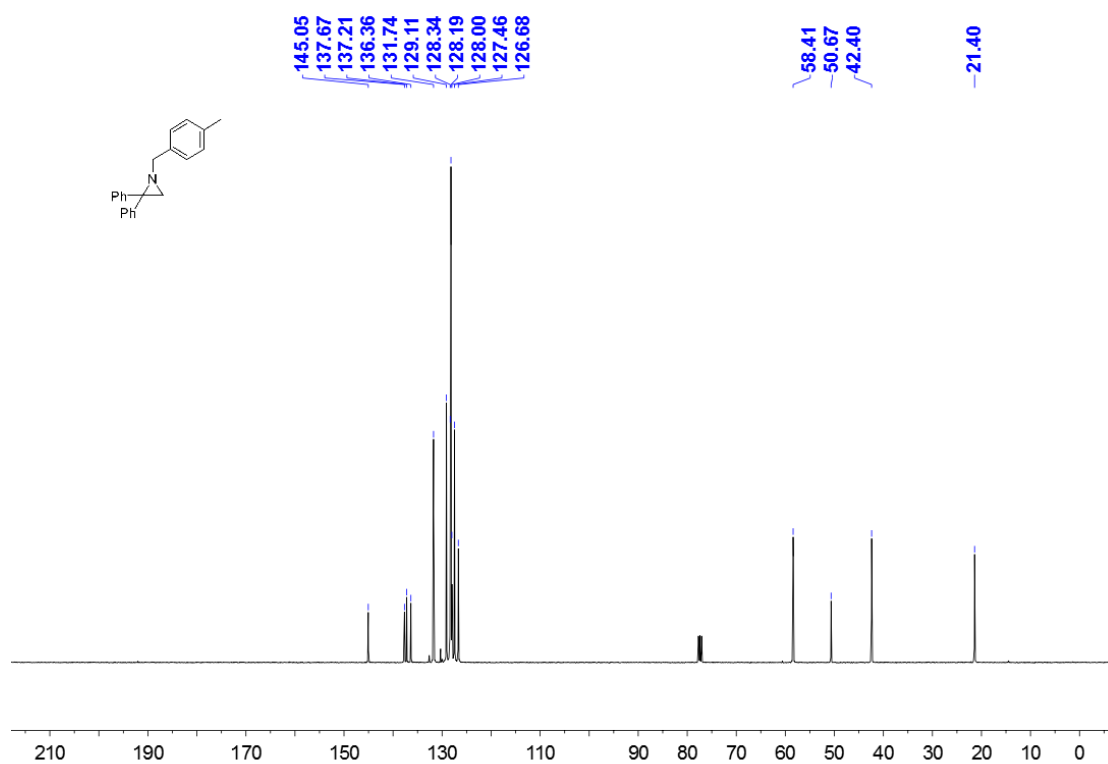

$^1\text{H}$  and  $^{13}\text{C}$  NMR of compound **2e**

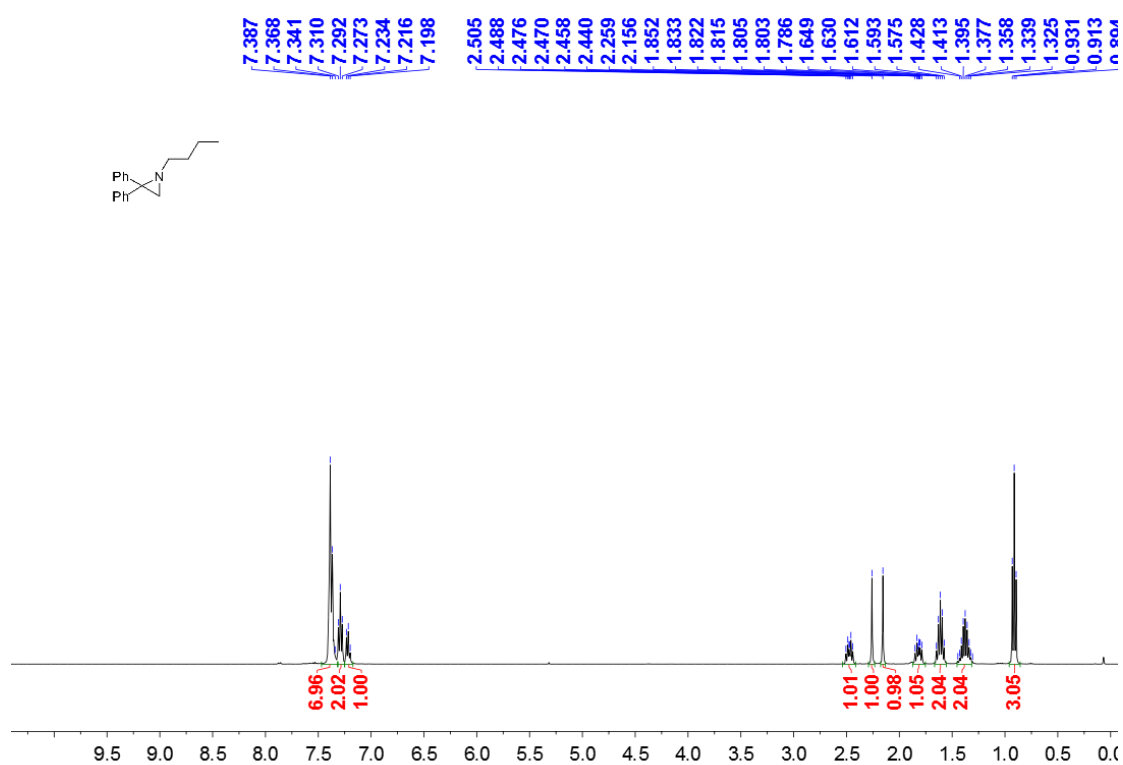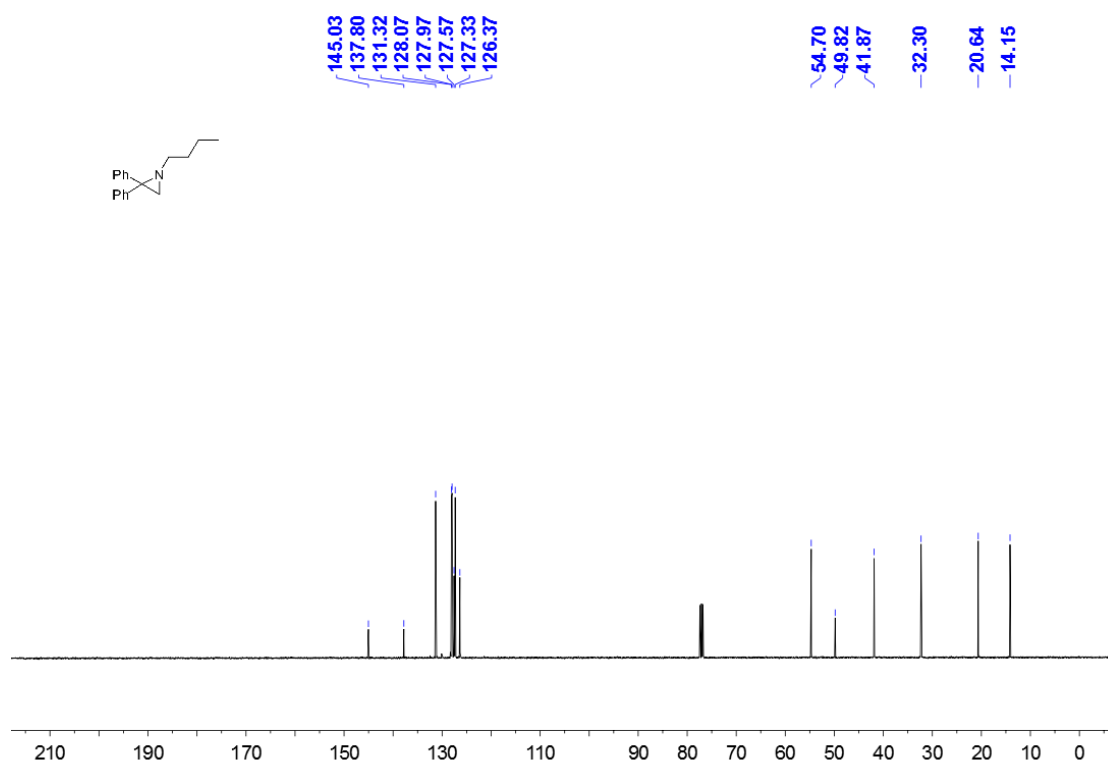

# <sup>1</sup>H and <sup>13</sup>C NMR of compound **2f**

7.353  
7.339  
7.337  
7.329  
7.325  
7.307  
7.255  
7.250  
7.241  
7.237  
7.234  
7.218  
7.187  
7.184  
7.181  
7.172  
7.166  
5.974  
5.961  
5.948  
5.931  
5.918  
5.905  
5.219  
5.214  
5.210  
5.205  
5.171  
5.167  
5.105  
5.101  
5.097  
5.093  
5.079  
5.075  
3.017  
3.004  
2.981  
2.977  
2.968  
2.528  
2.525  
2.521  
2.514  
2.488  
2.474  
2.250  
2.146

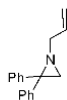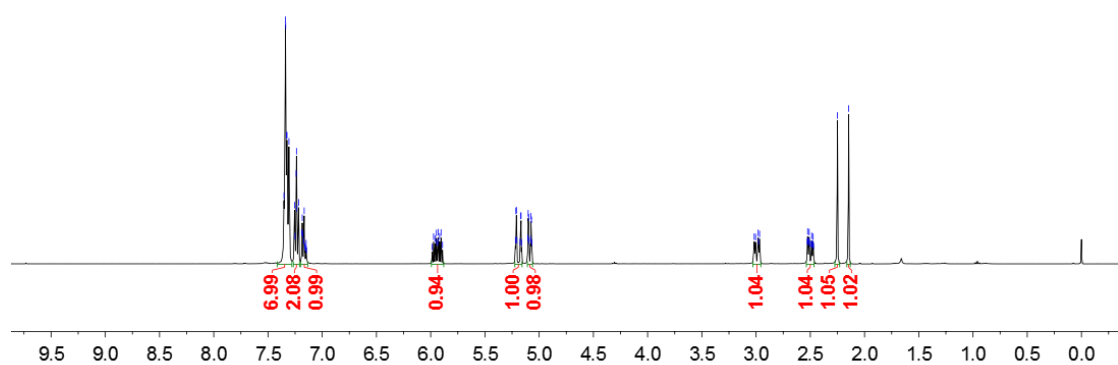

144.65  
137.35  
136.09  
131.43  
128.12  
127.97  
127.79  
127.18  
126.47  
115.90

57.07  
50.28  
41.70

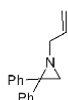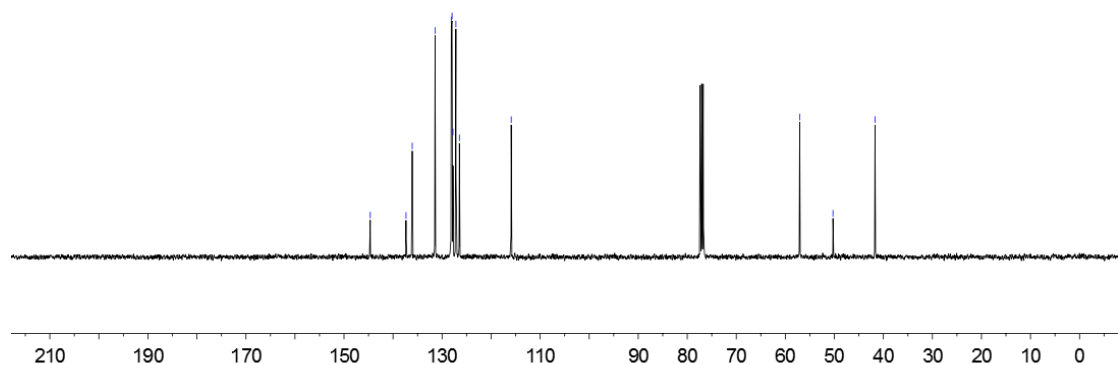

$^1\text{H}$  and  $^{13}\text{C}$  NMR of compound **2g**

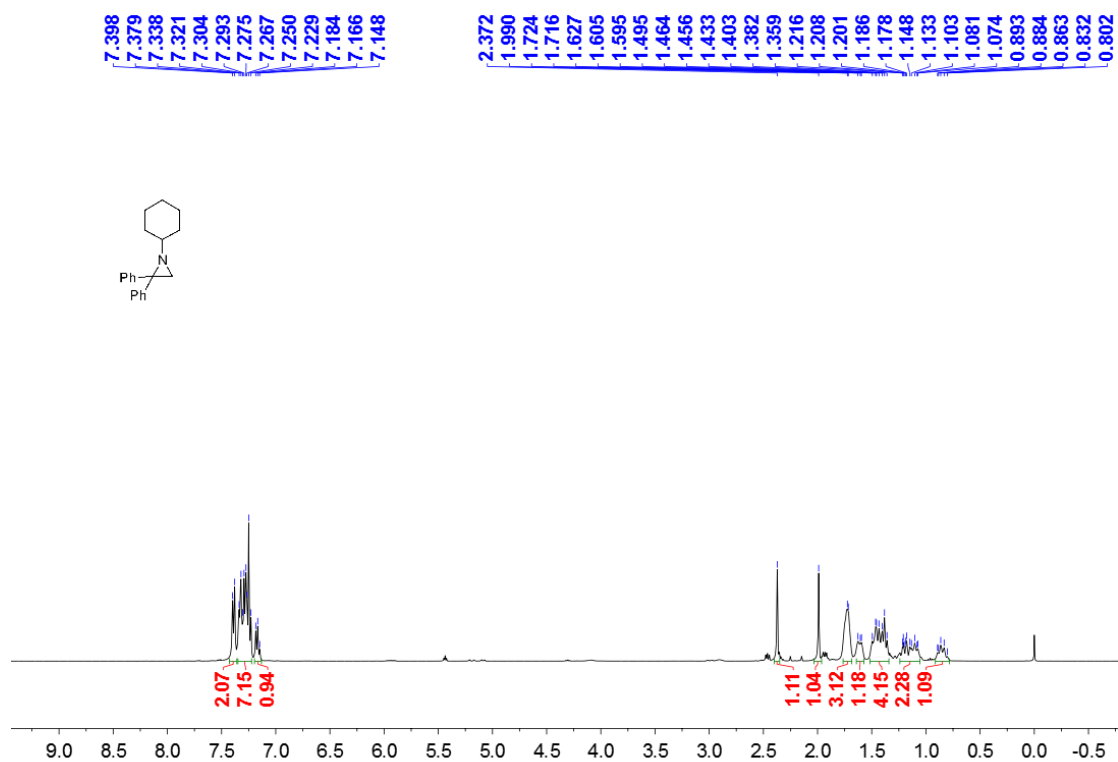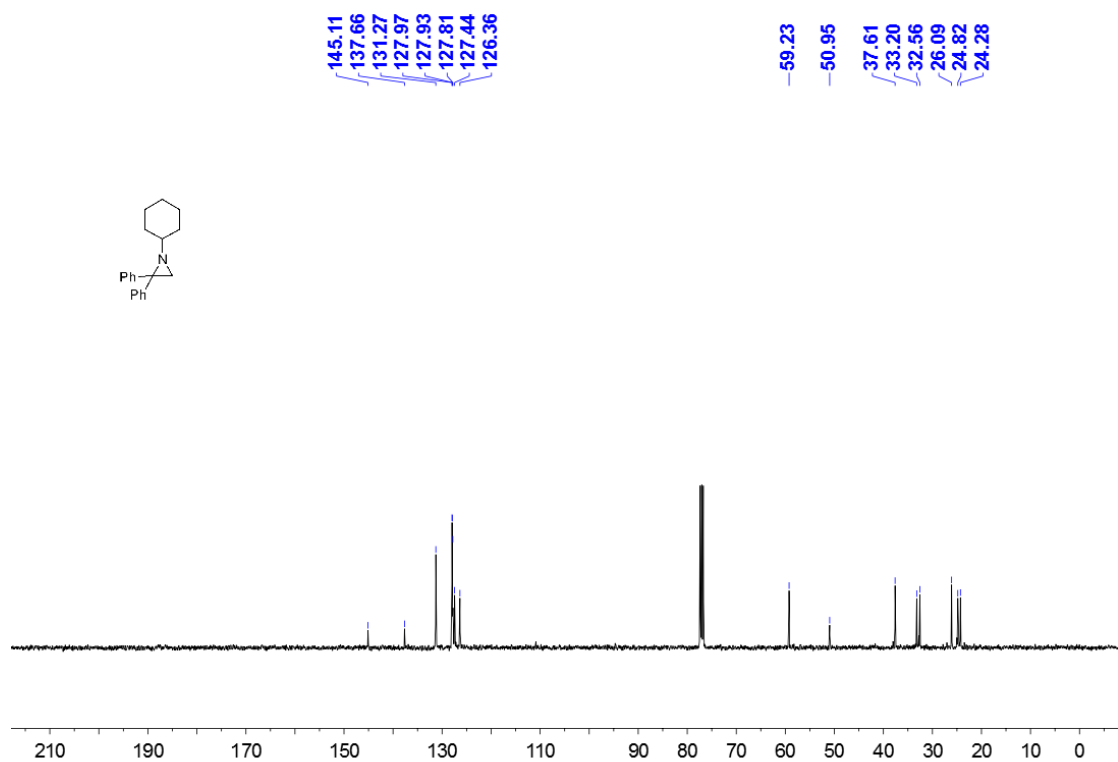

$^1\text{H}$  and  $^{13}\text{C}$  NMR of compound **3aa**

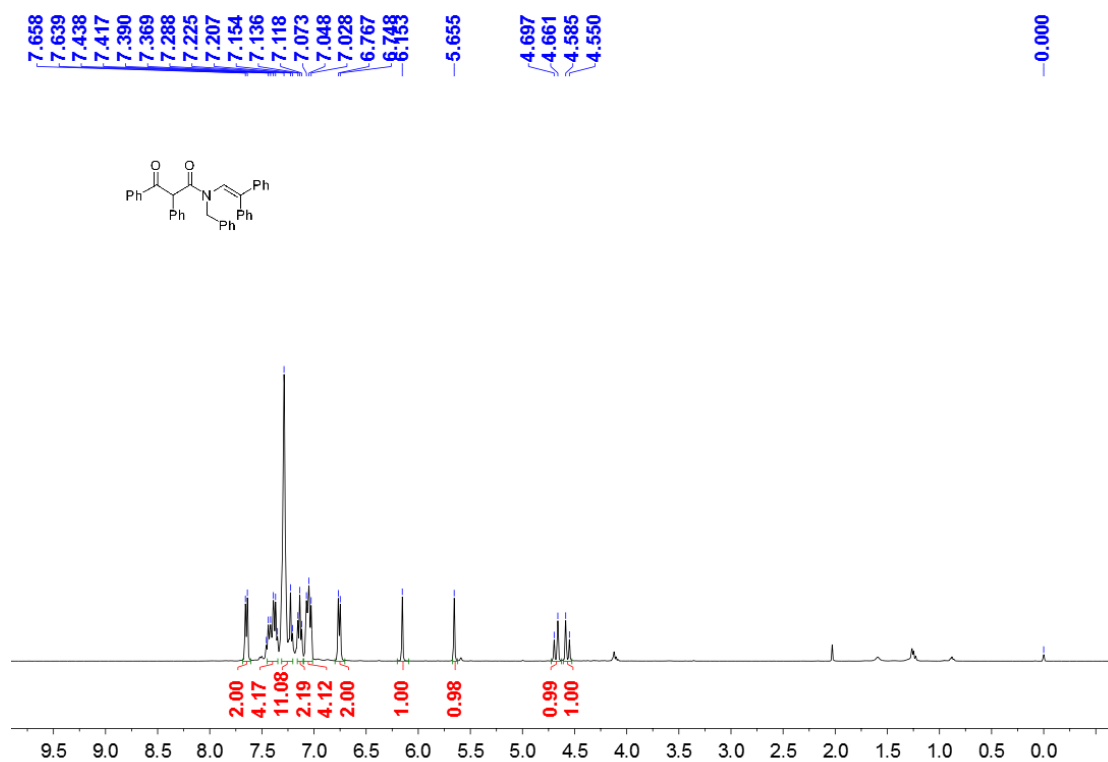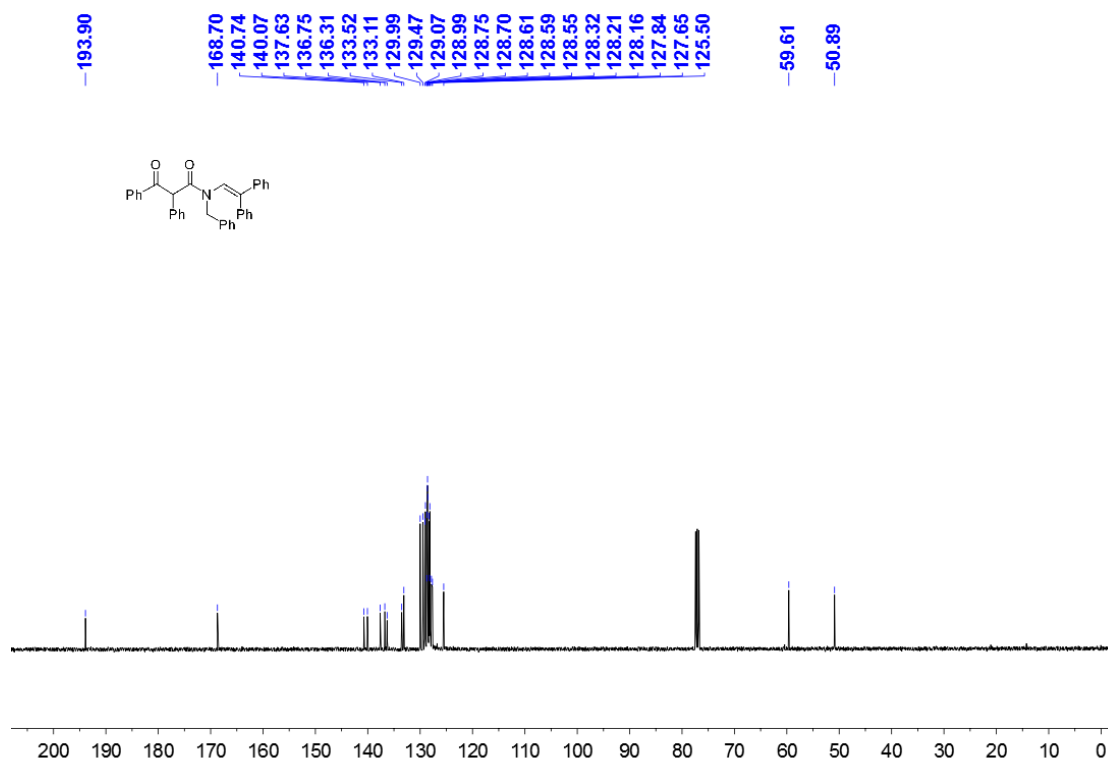

$^1\text{H}$  and  $^{13}\text{C}$  NMR of compound **3ba**

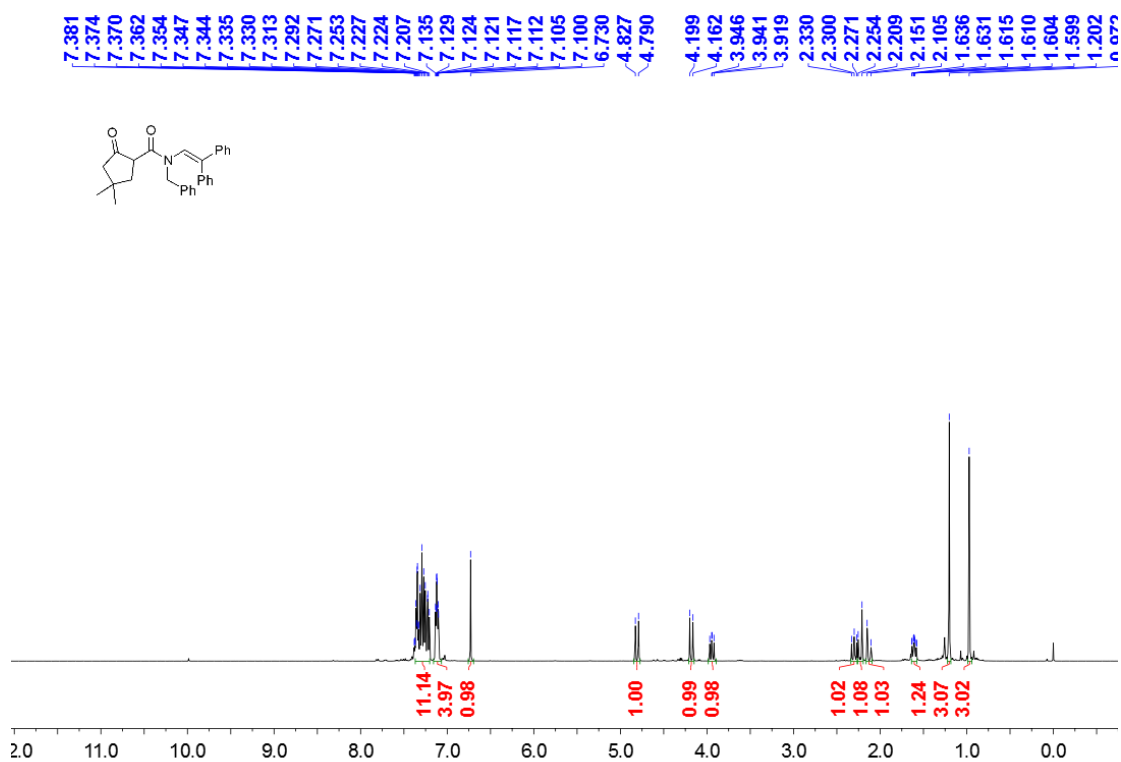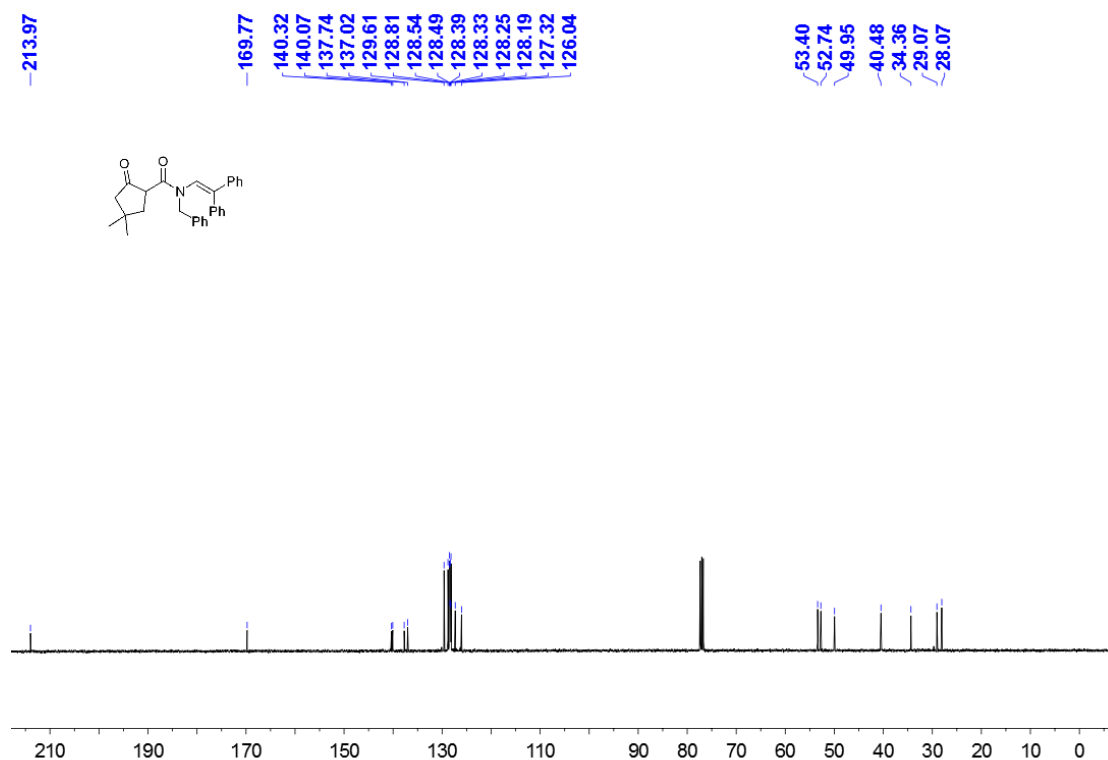

$^1\text{H}$  and  $^{13}\text{C}$  NMR of compound **3ca**

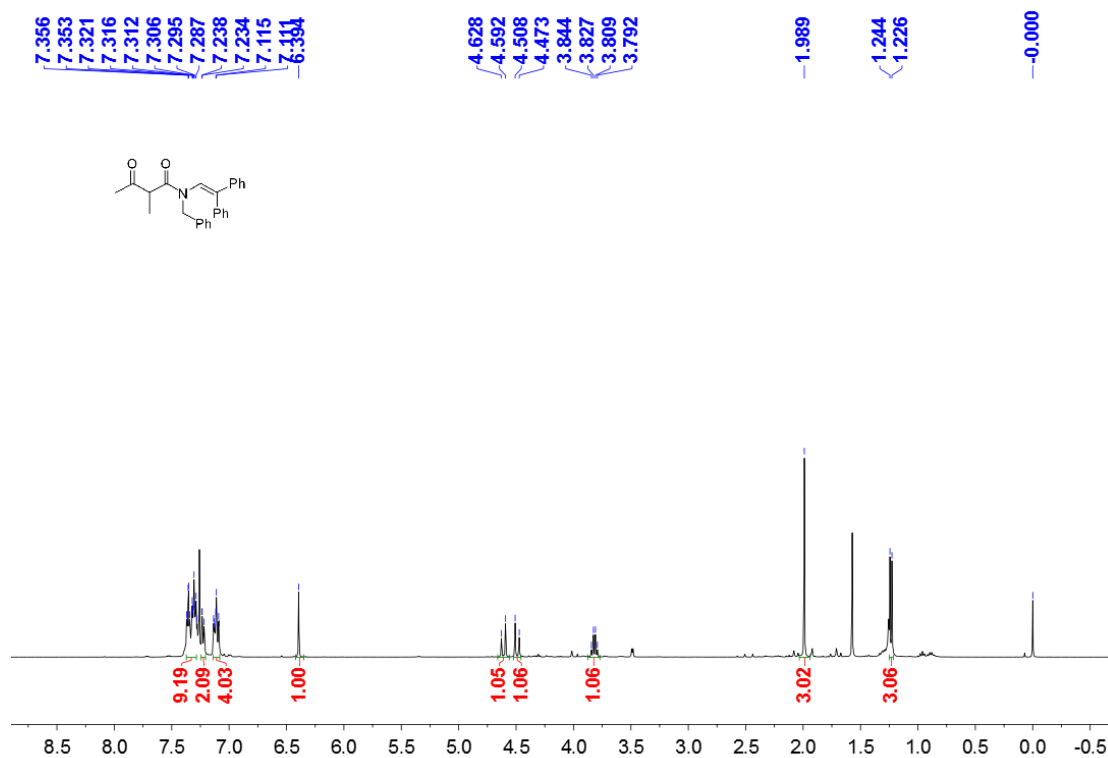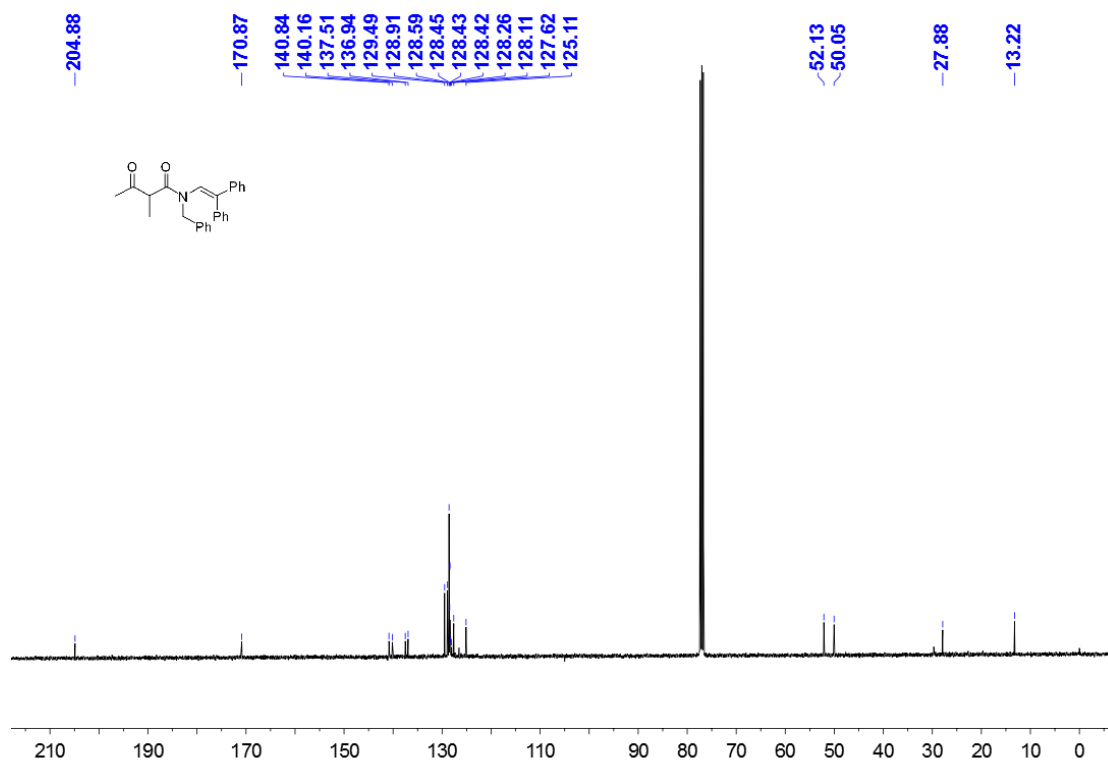

$^1\text{H}$  and  $^{13}\text{C}$  NMR of compound **3da**

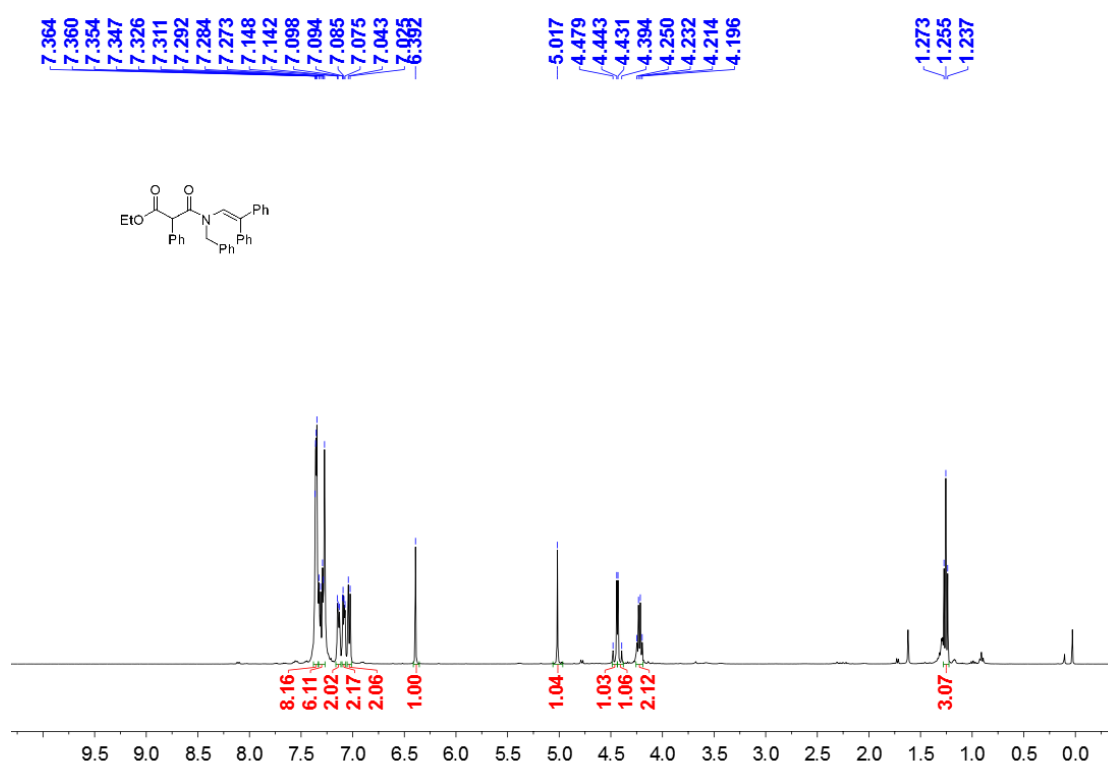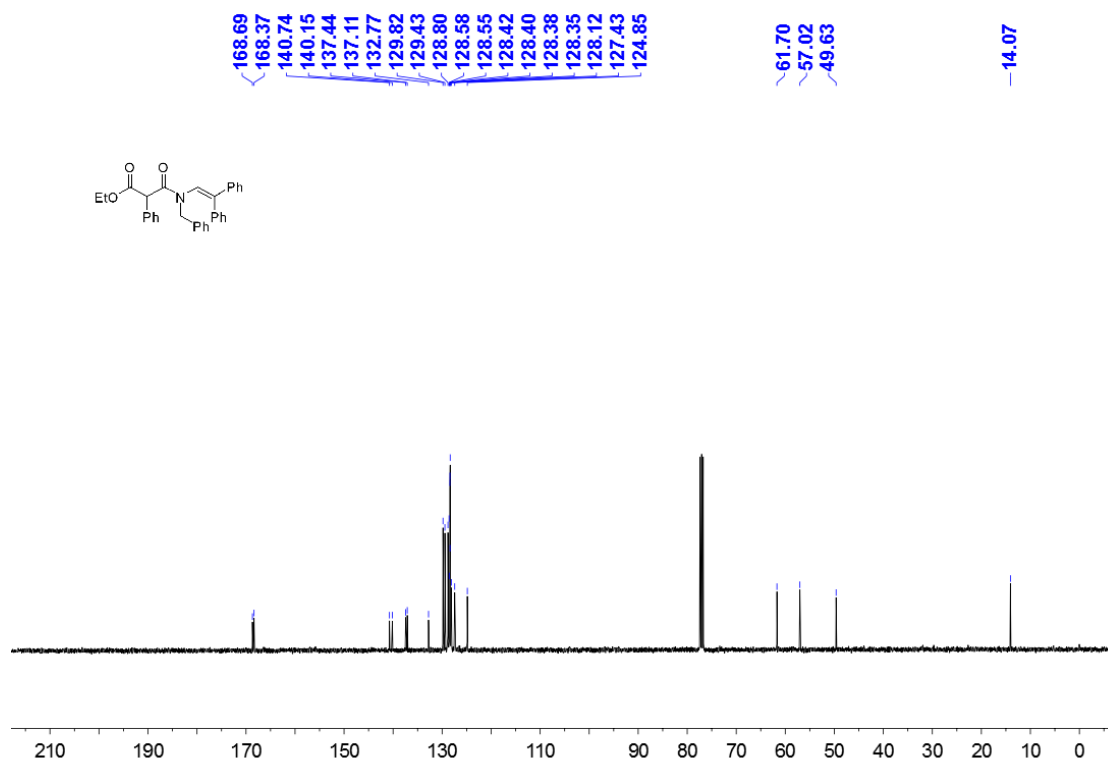

$^1\text{H}$  and  $^{13}\text{C}$  NMR of compound **3ea**

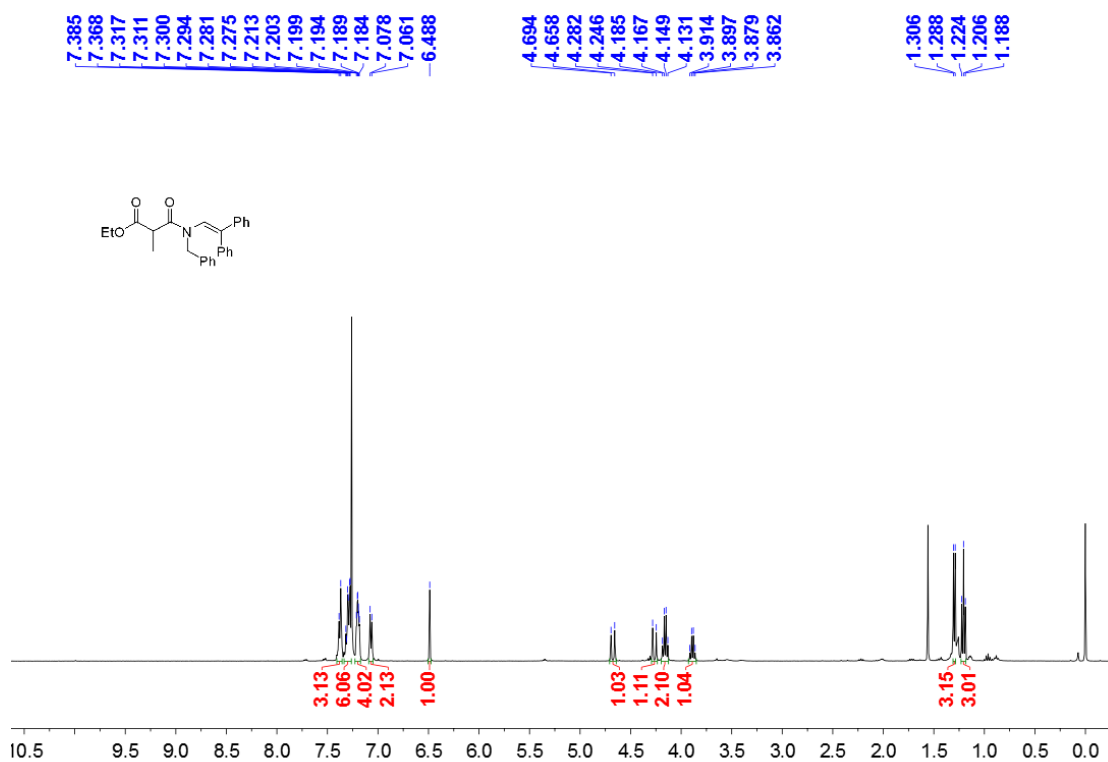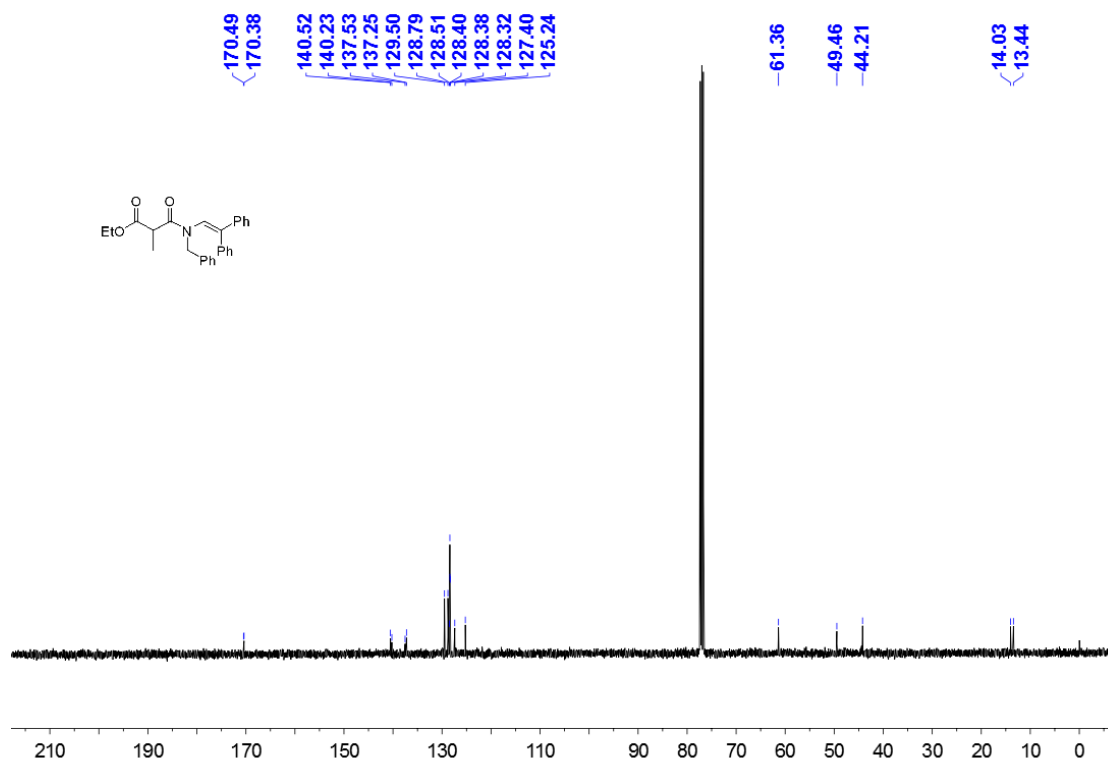

$^1\text{H}$  and  $^{13}\text{C}$  NMR of compound **3fa**

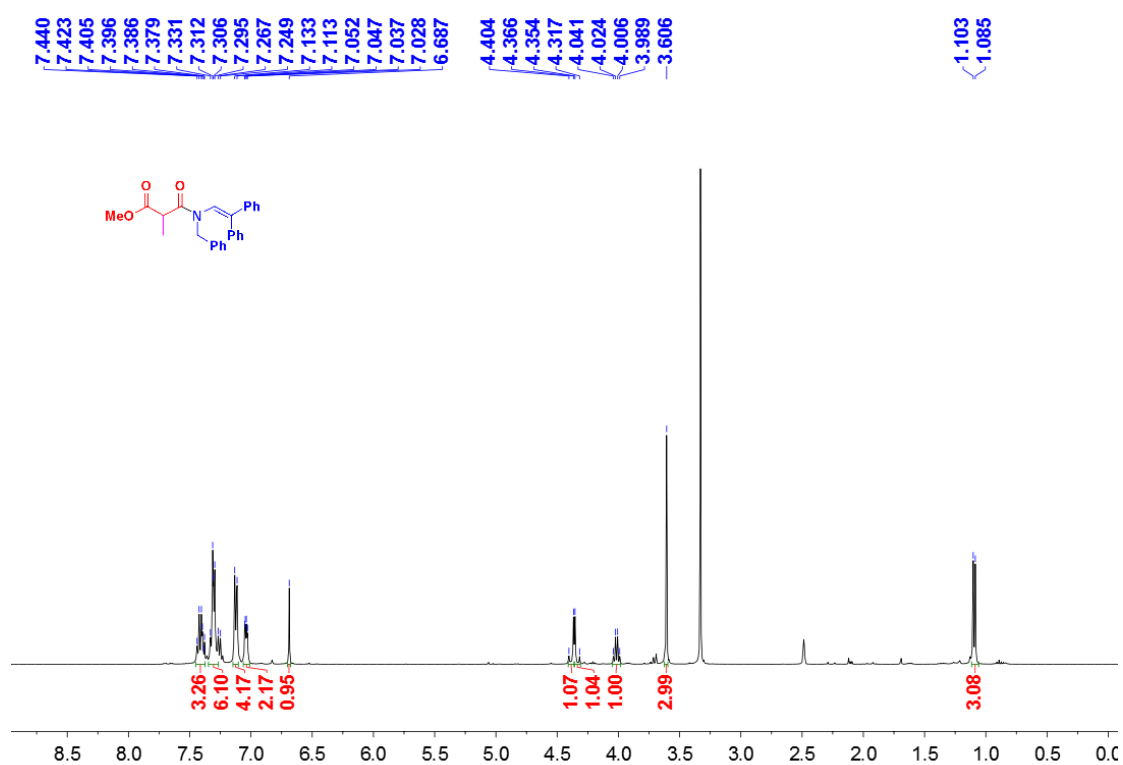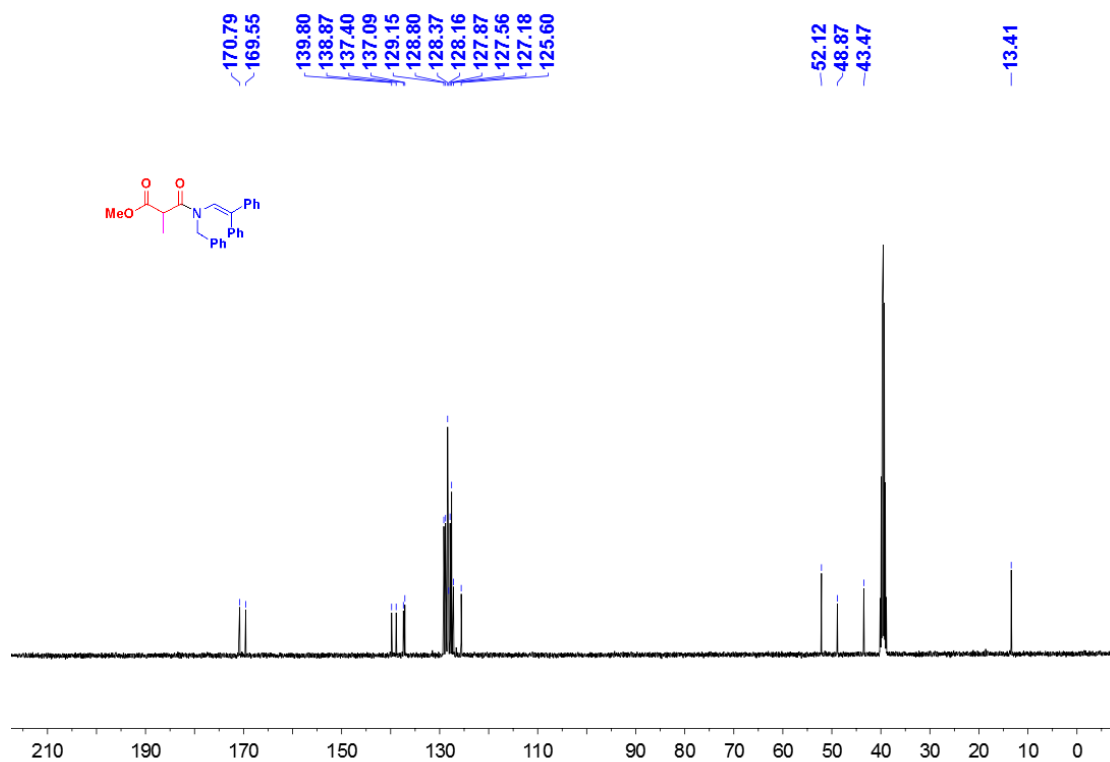

# DEPT of compound **3fa**

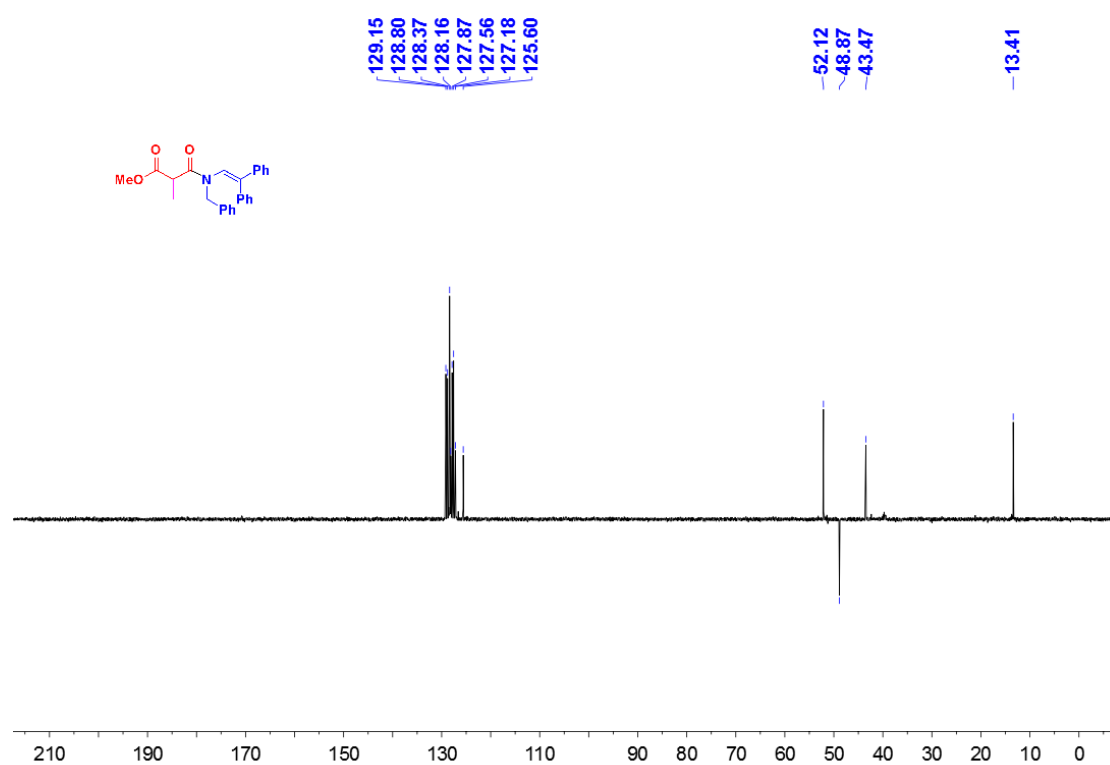

# H-H COSY compound **3fa**

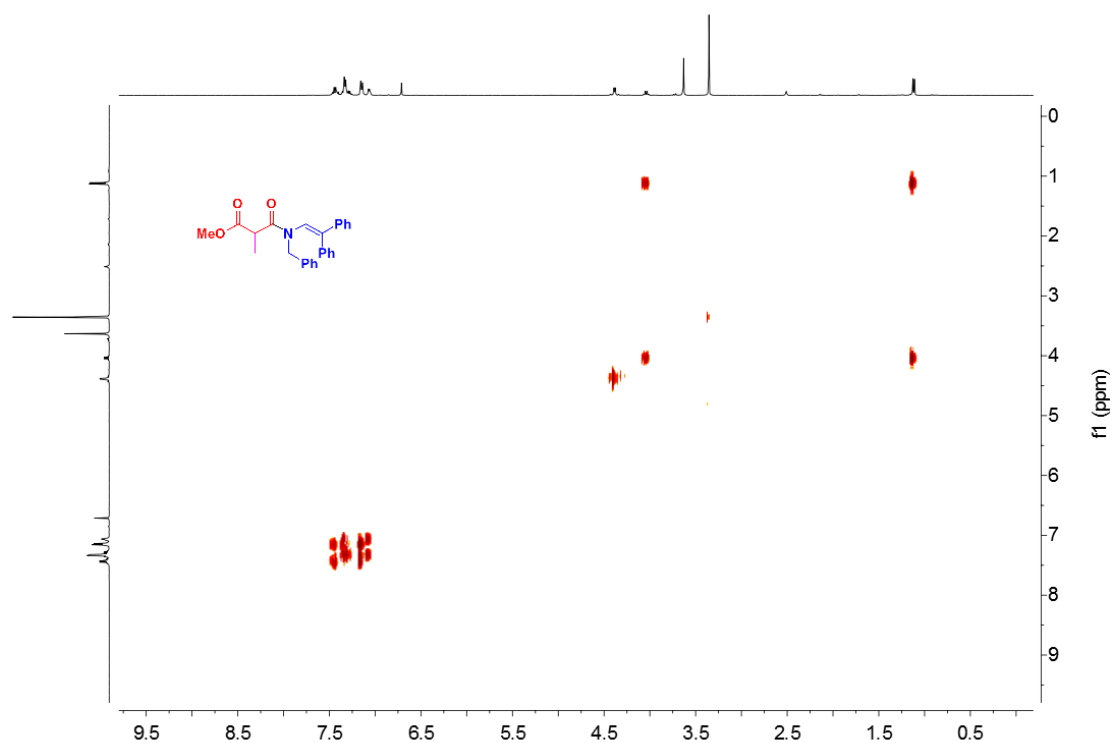

HSQC compound **3fa**

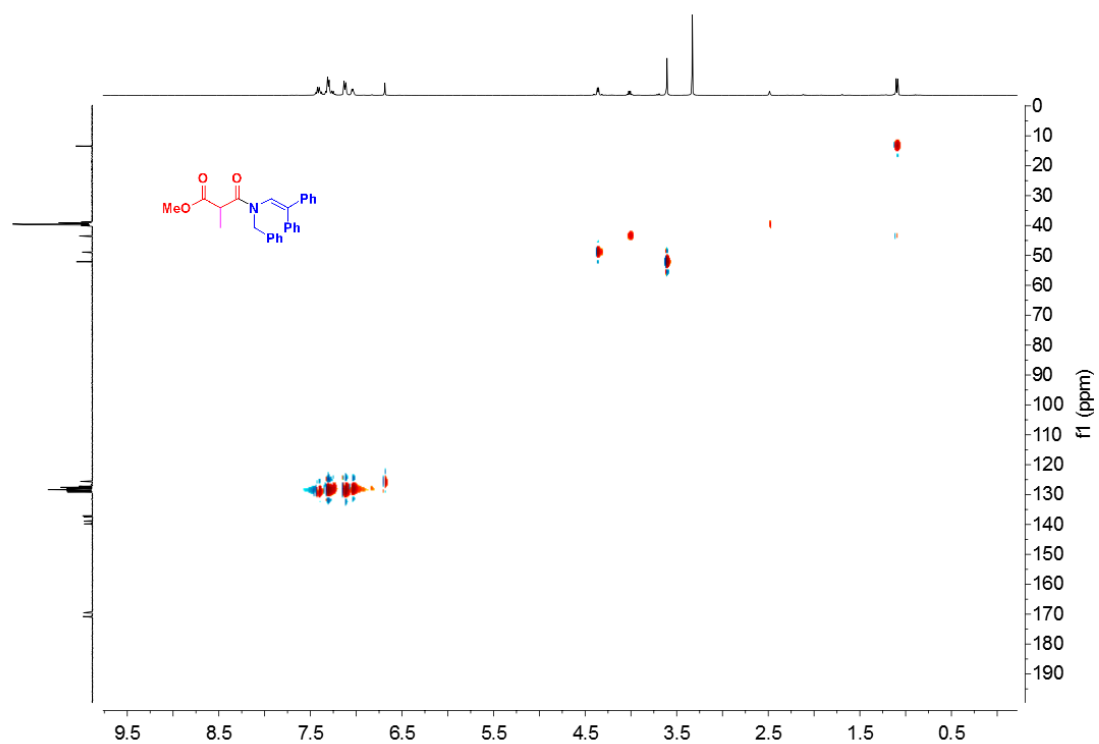

HMBC compound **3fa**

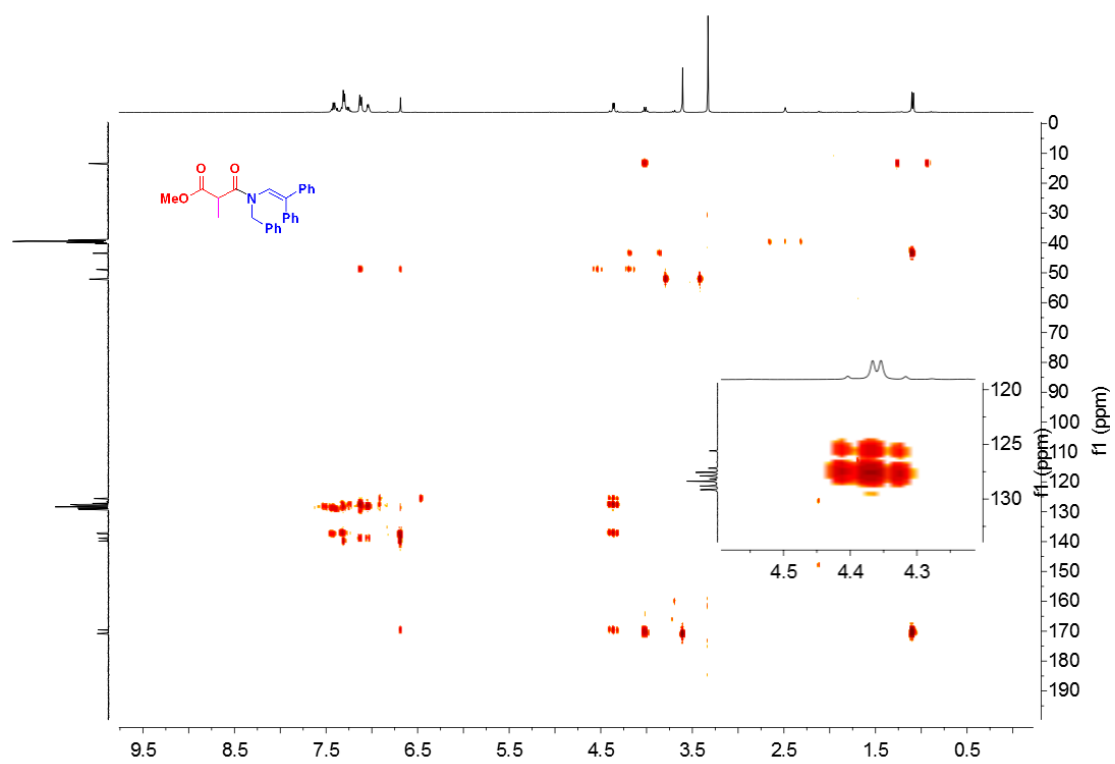

$^1\text{H}$  and  $^{13}\text{C}$  NMR of compound **3ga**

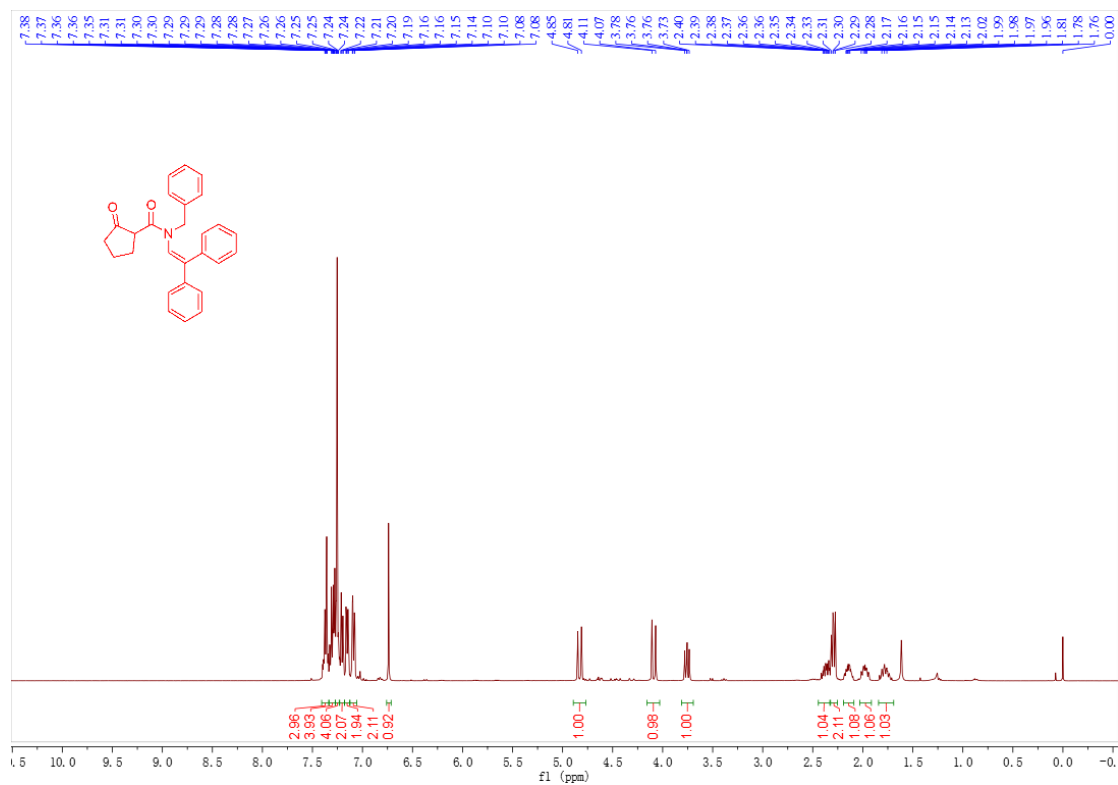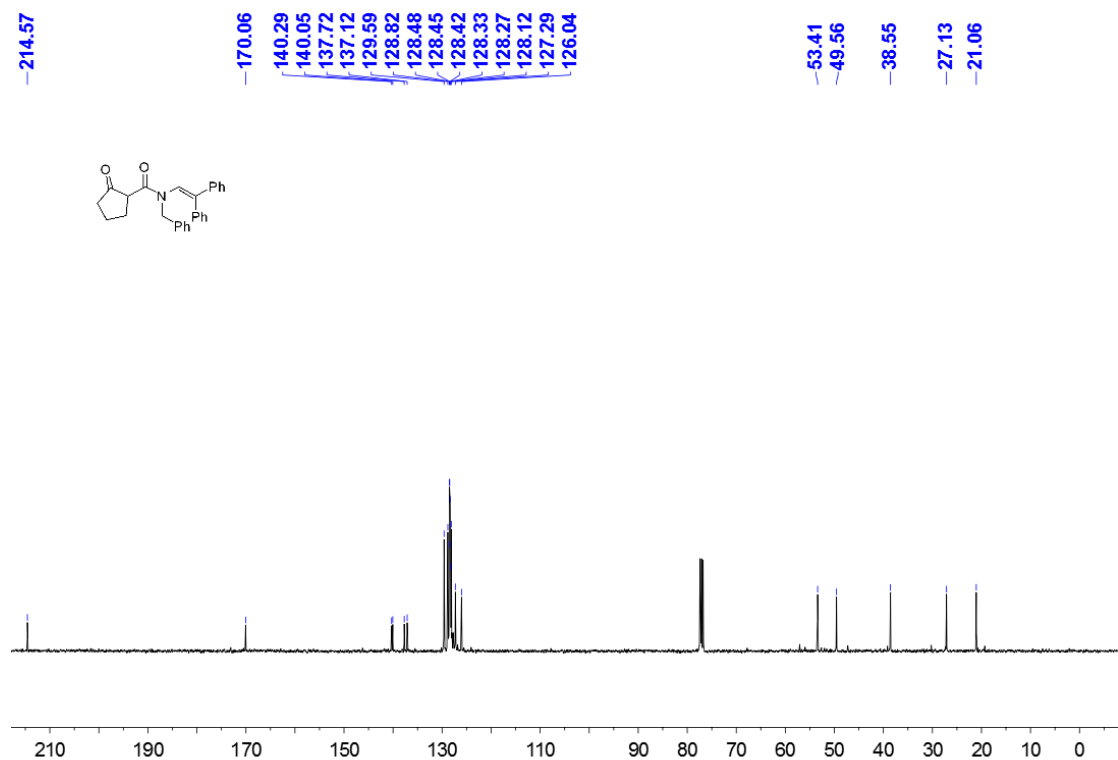

$^1\text{H}$  and  $^{13}\text{C}$  NMR of compound **3ha**

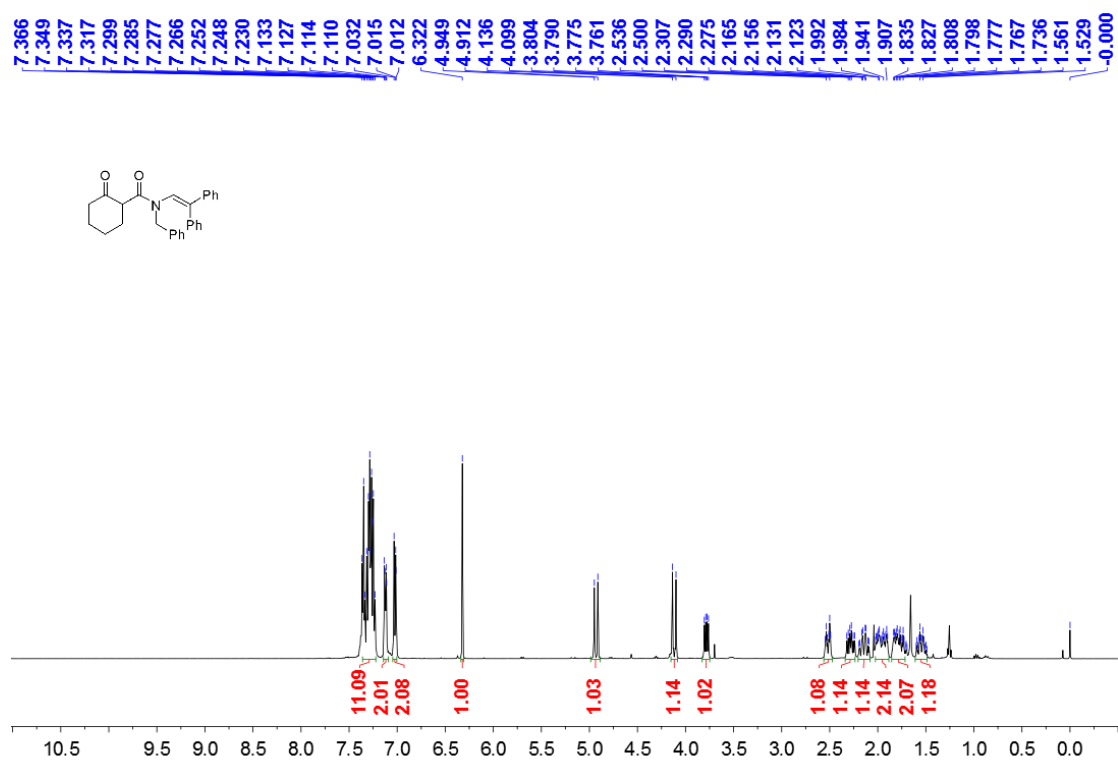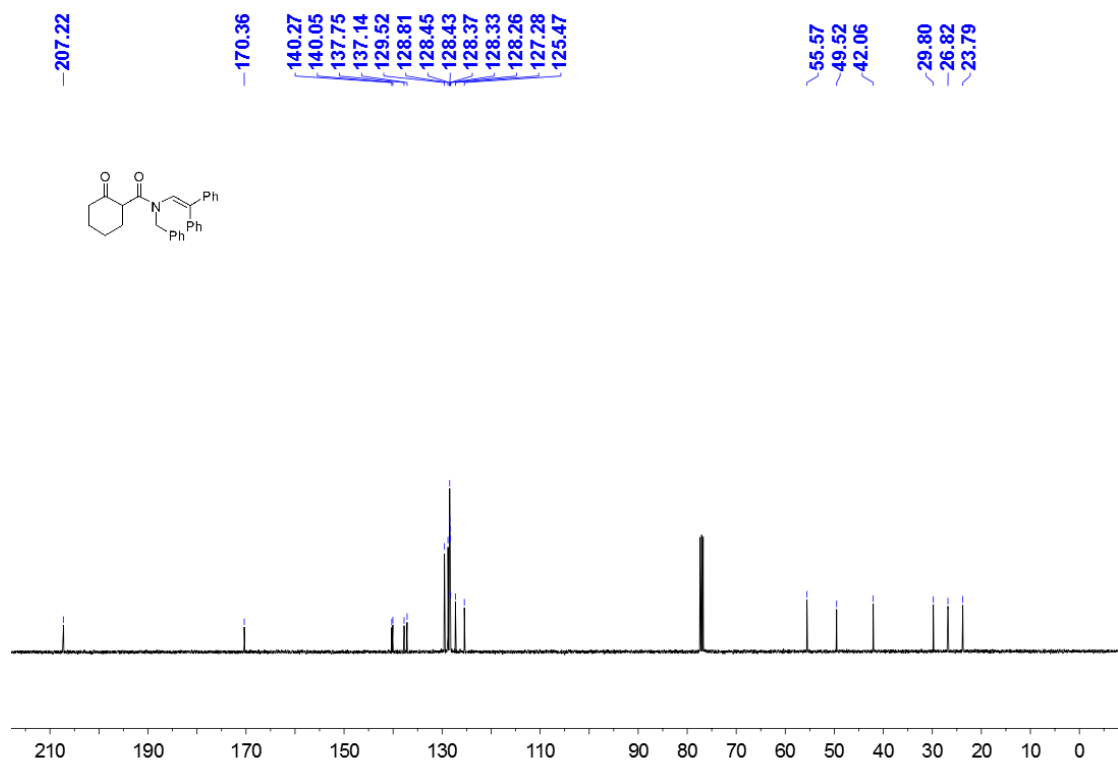

$^1\text{H}$  and  $^{13}\text{C}$  NMR of compound **3ia**

$^1\text{H}$  NMR peaks (ppm): 7.457, 7.442, 7.423, 7.417, 7.413, 7.409, 7.401, 7.390, 7.333, 7.329, 7.316, 7.312, 7.294, 7.284, 7.267, 7.255, 7.247, 7.243, 7.224, 7.208, 7.100, 7.086, 7.061, 7.044, 6.893, 6.860, 4.778, 4.741, 4.168, 4.130, 4.109, 4.088, 4.079, 4.060, 2.425, 2.389, 2.380, 2.111, 2.096, 2.005, 1.976, 1.966, 1.882, 1.854, 1.837, 1.809, 1.141, 1.125, 1.039, 1.022.

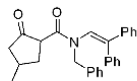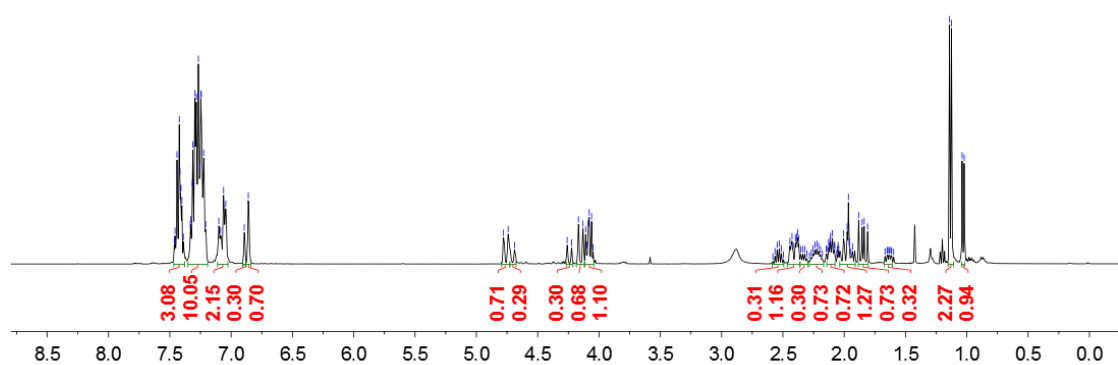

$^{13}\text{C}$  NMR peaks (ppm): 214.84, 214.29, 170.83, 170.63, 141.53, 139.96, 139.93, 139.13, 139.08, 138.67, 138.59, 130.57, 129.65, 129.24, 129.19, 129.15, 129.07, 129.04, 128.92, 128.88, 128.80, 128.04, 127.96, 127.51, 127.30, 56.00, 52.52, 49.81, 49.59, 47.30, 47.27, 36.29, 30.11, 20.88, 20.22.

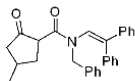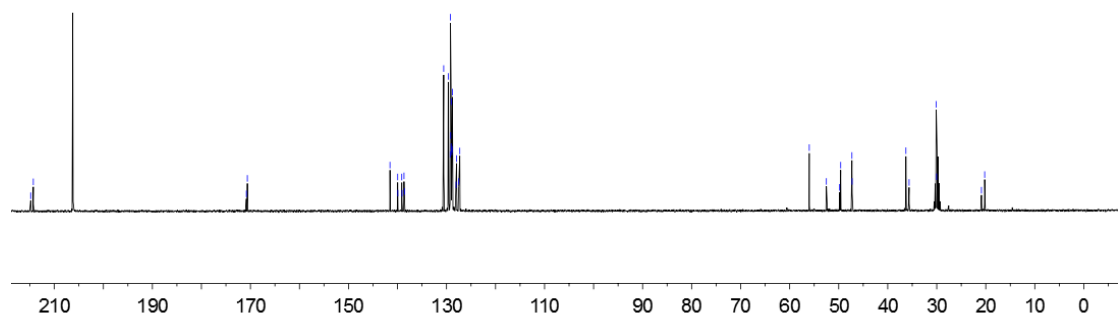

$^1\text{H}$  and  $^{13}\text{C}$  NMR of compound **3ja**

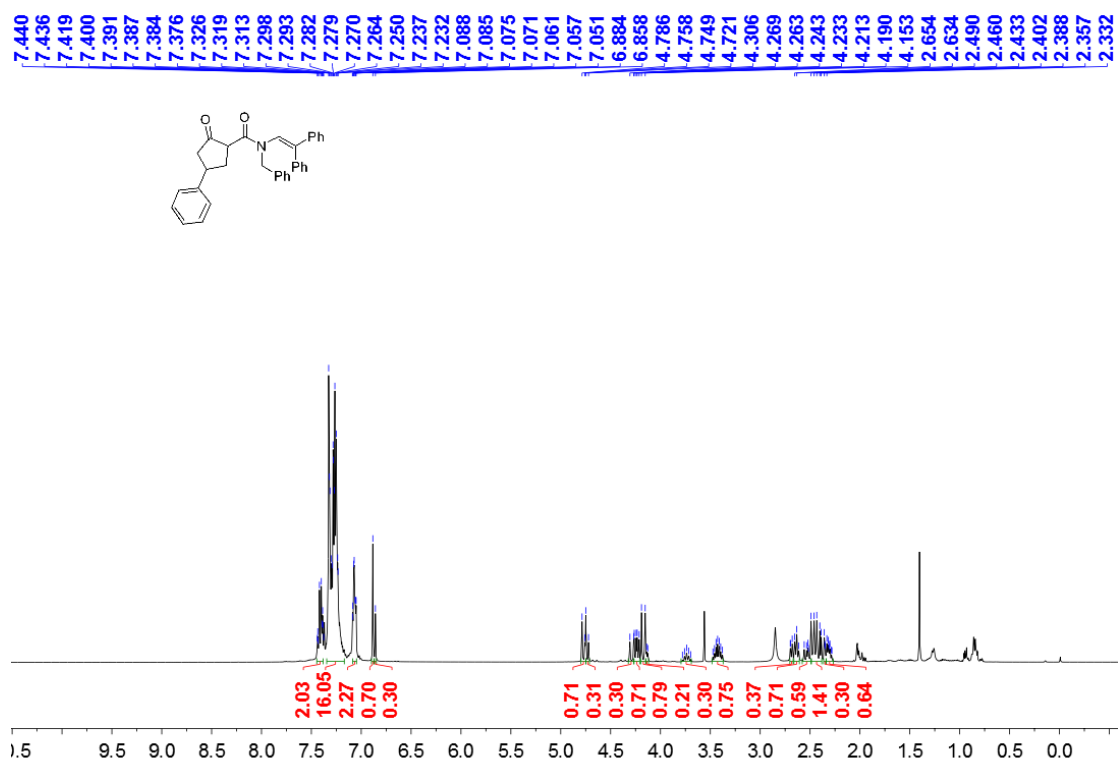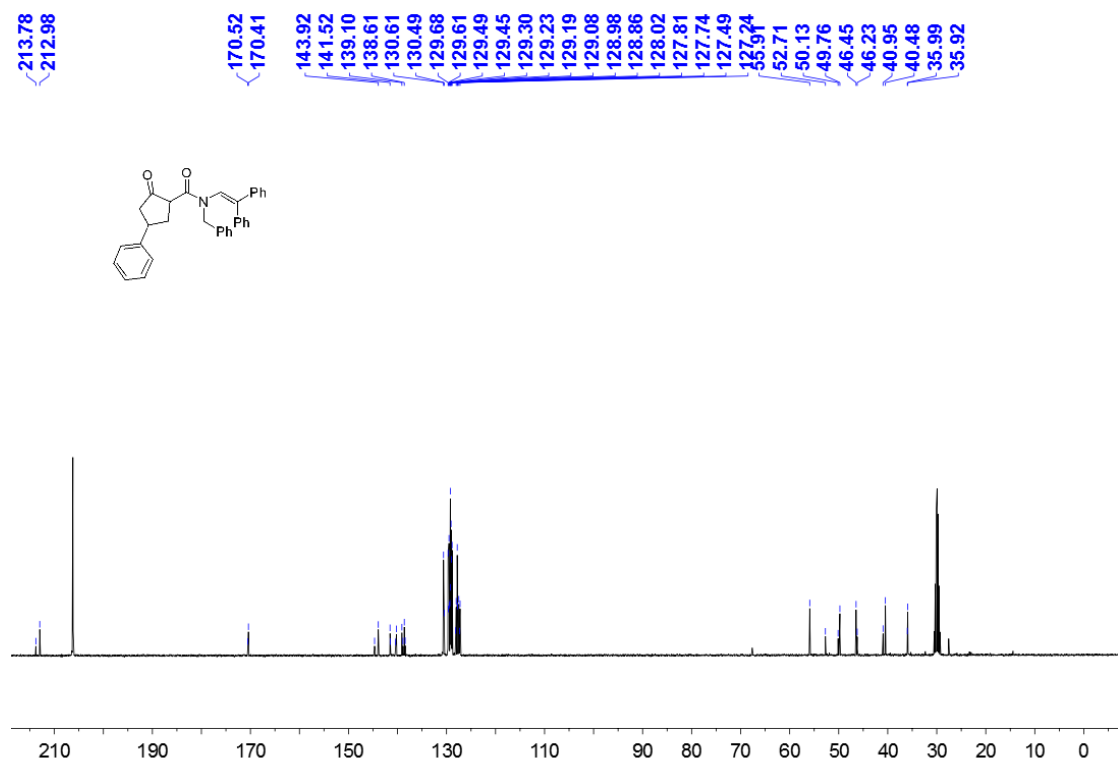

$^1\text{H}$  and  $^{13}\text{C}$  NMR of compound **3ka**

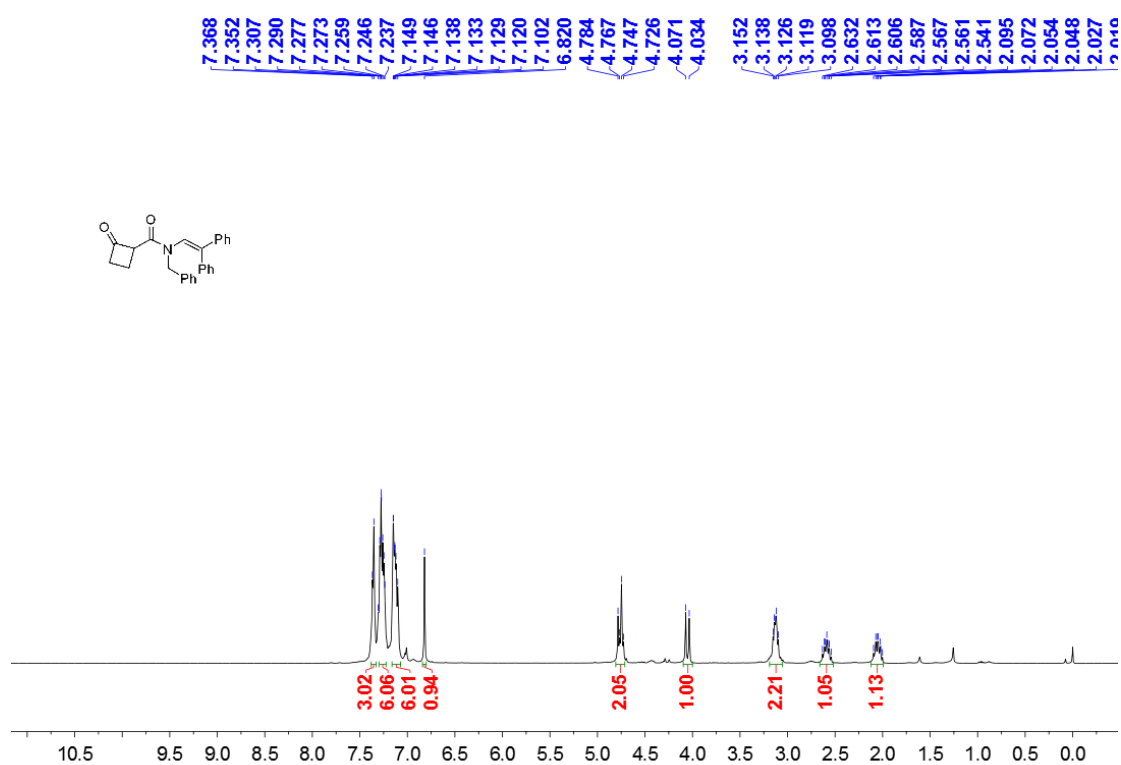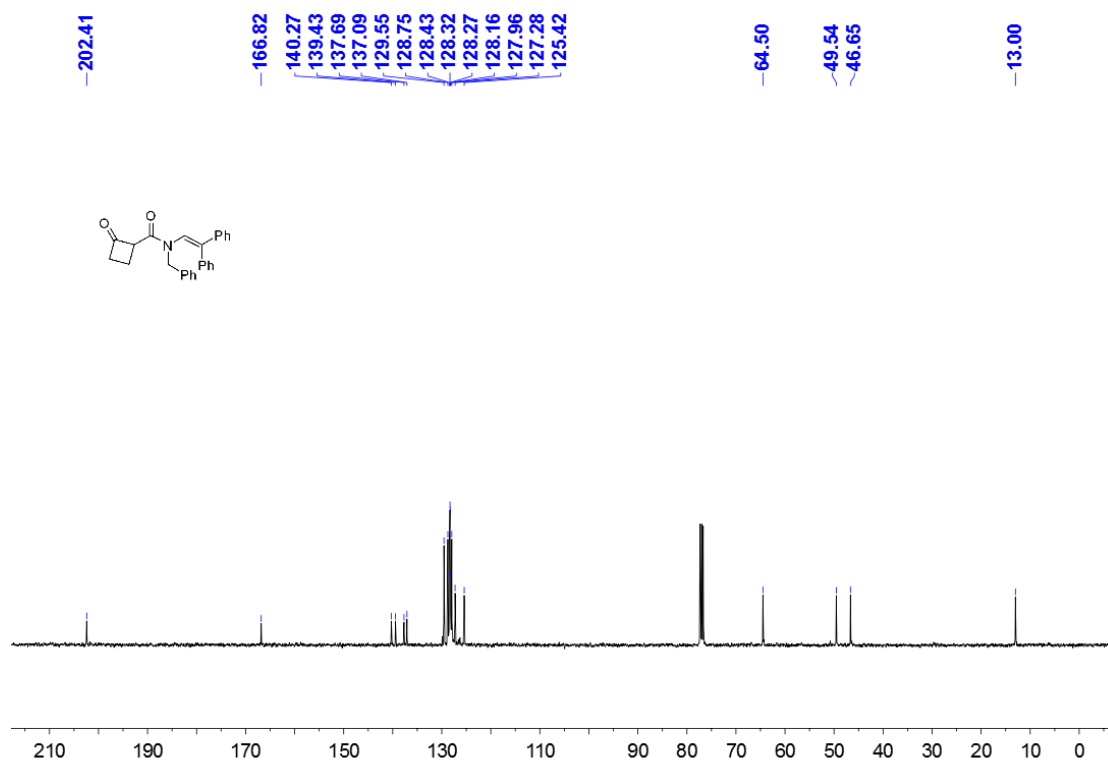

$^1\text{H}$  and  $^{13}\text{C}$  NMR of compound **3la**

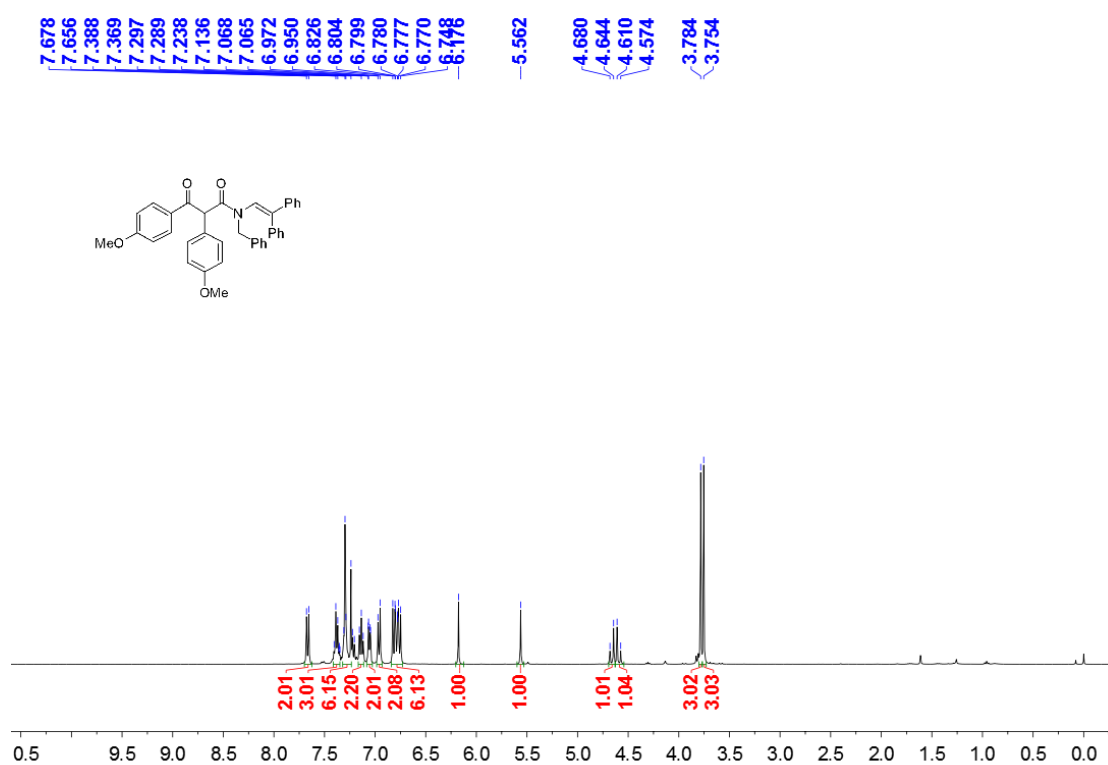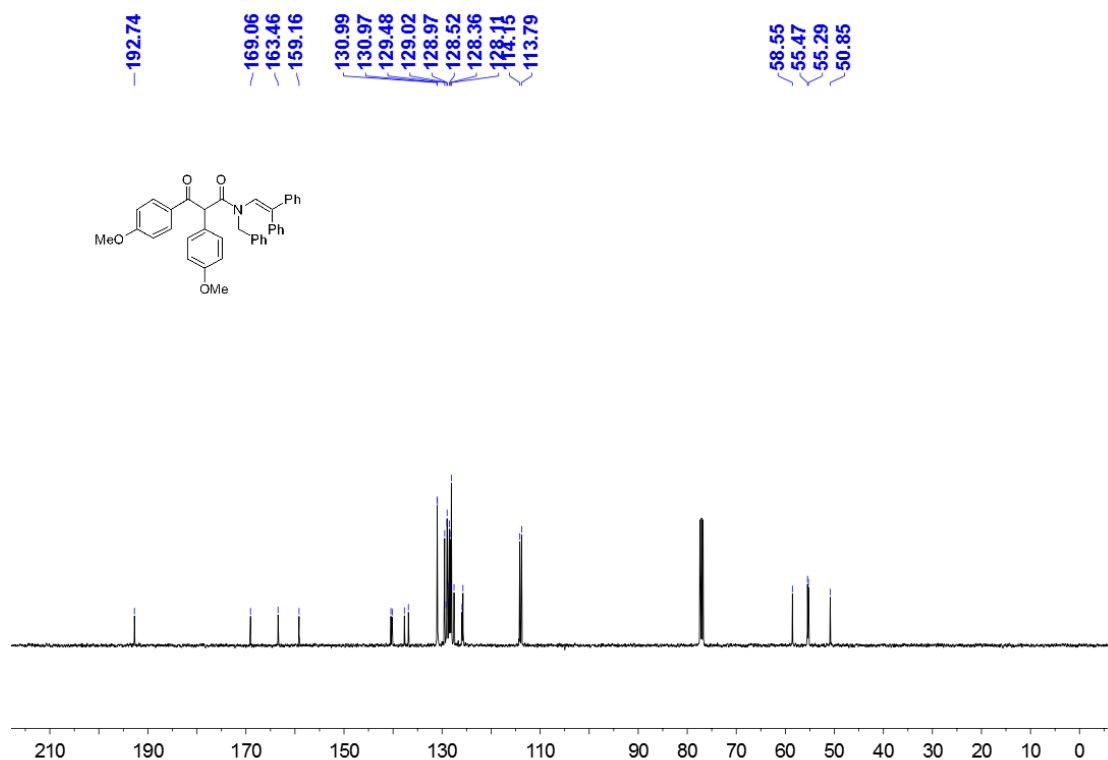

$^1\text{H}$  and  $^{13}\text{C}$  NMR of compound **3ma**

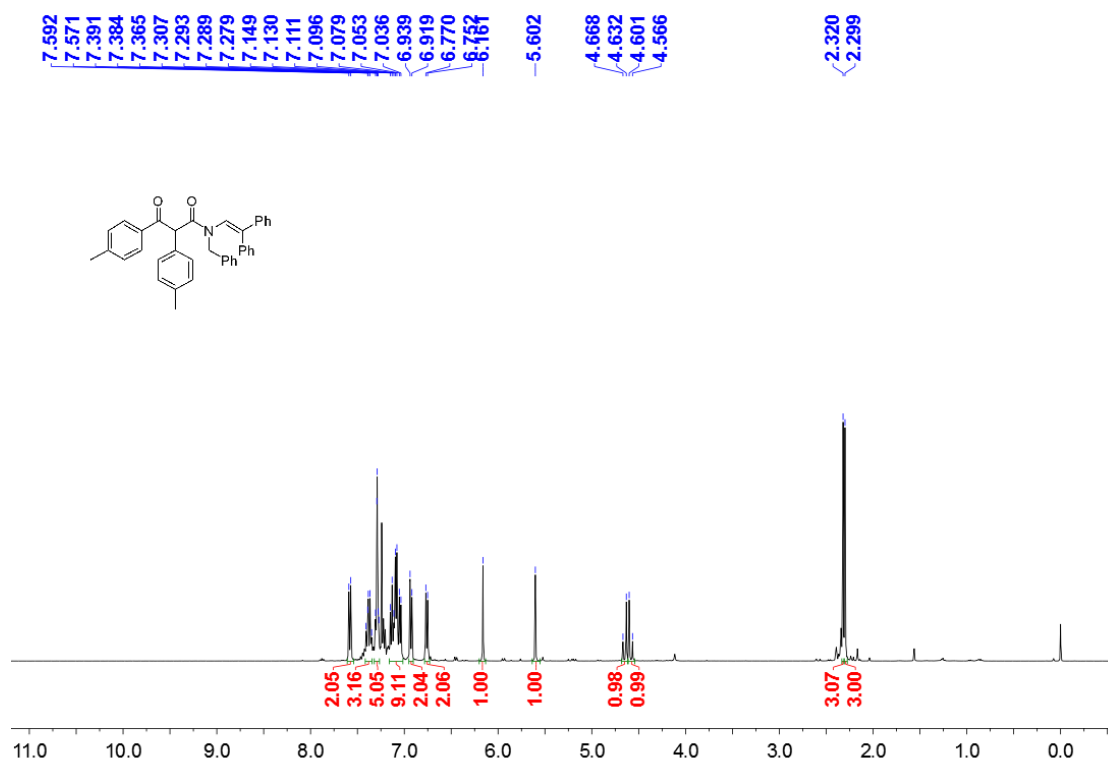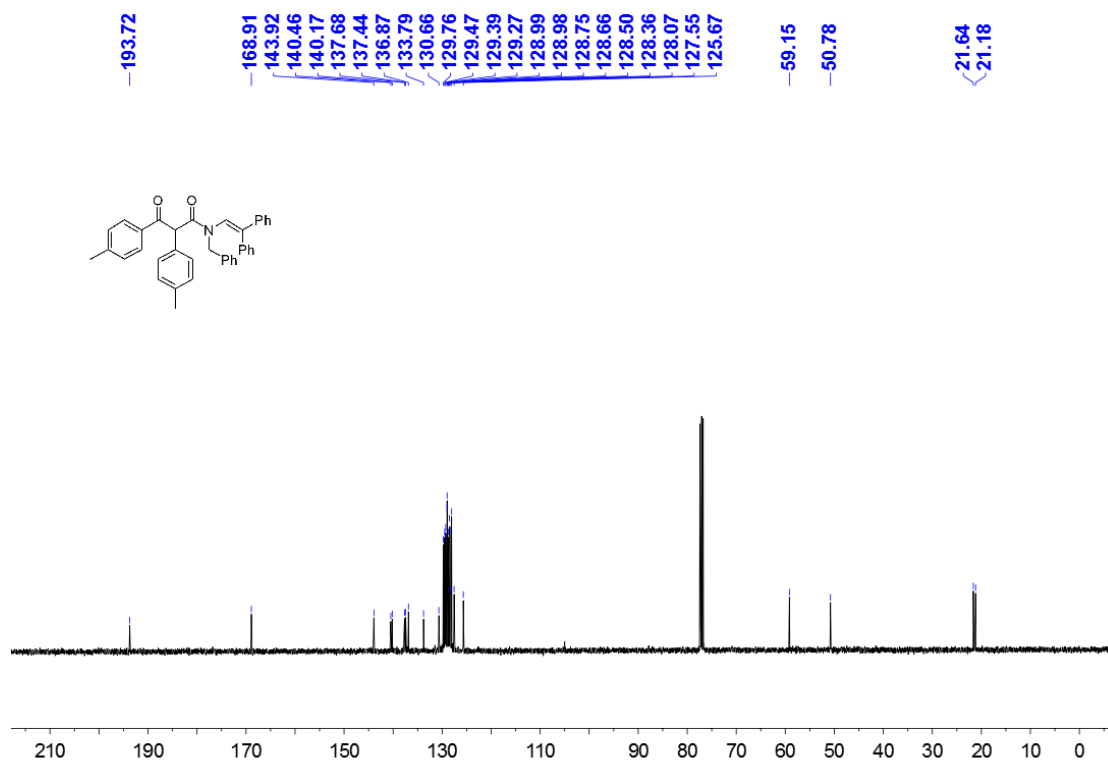

$^1\text{H}$  and  $^{13}\text{C}$  NMR of compound **3na**

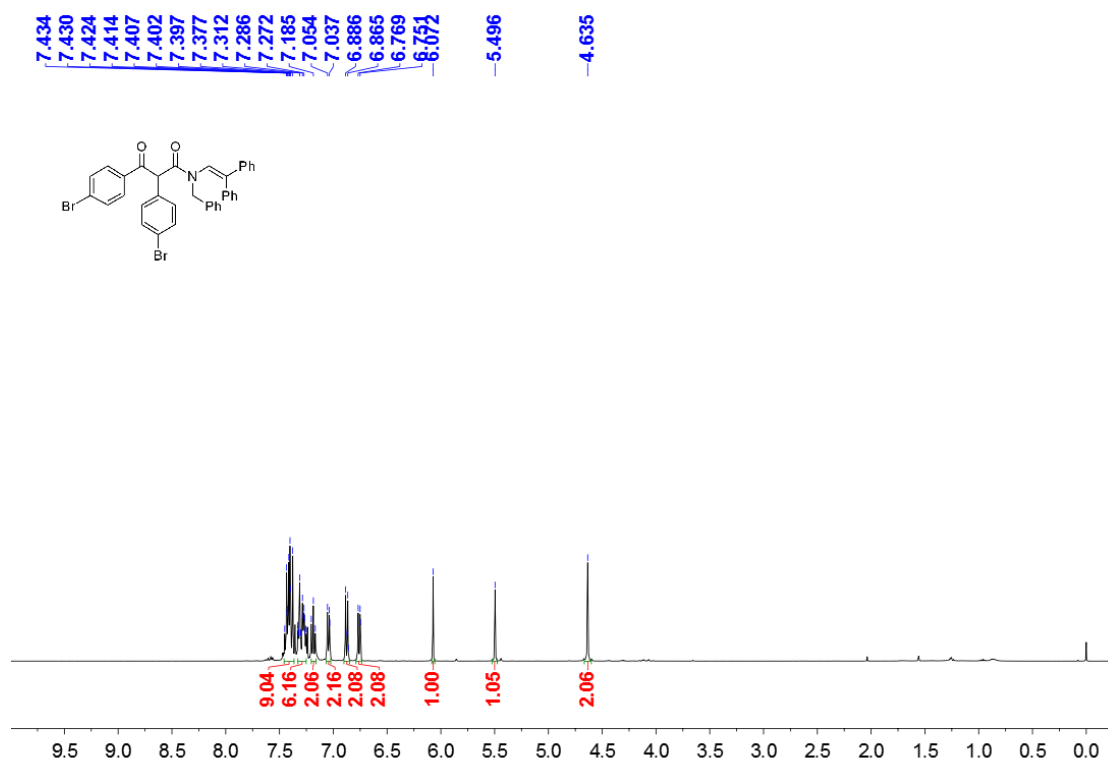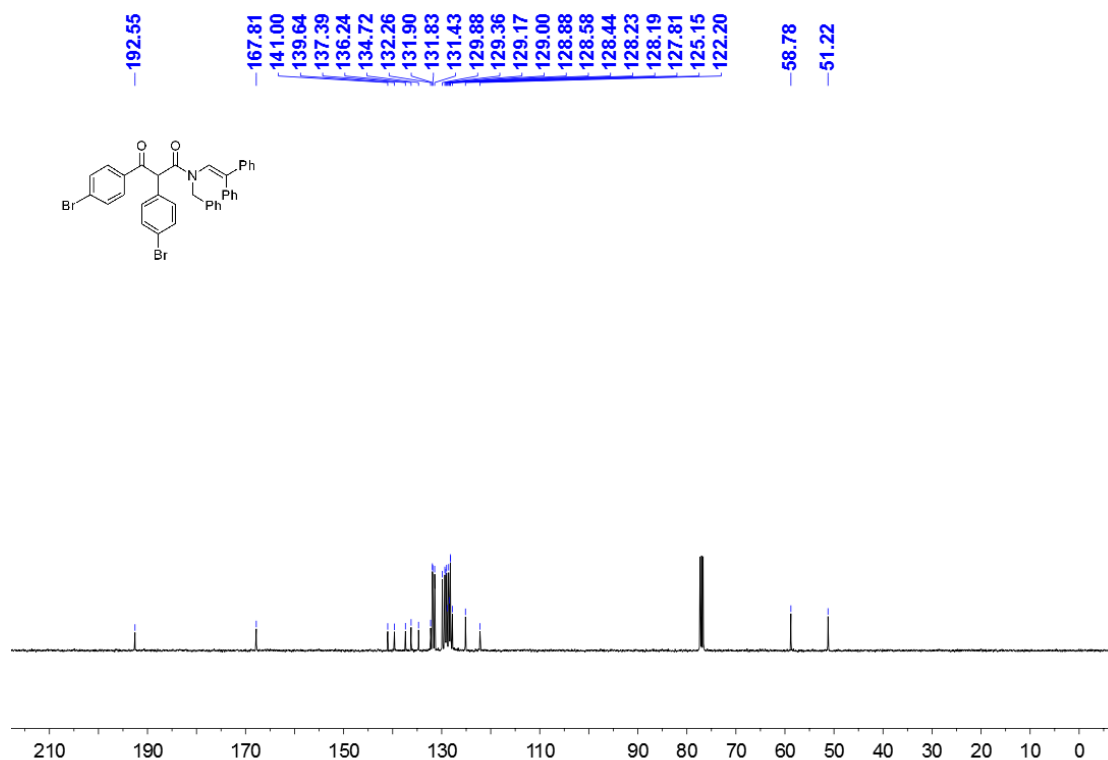

$^1\text{H}$  and  $^{13}\text{C}$  NMR of compound **30a**

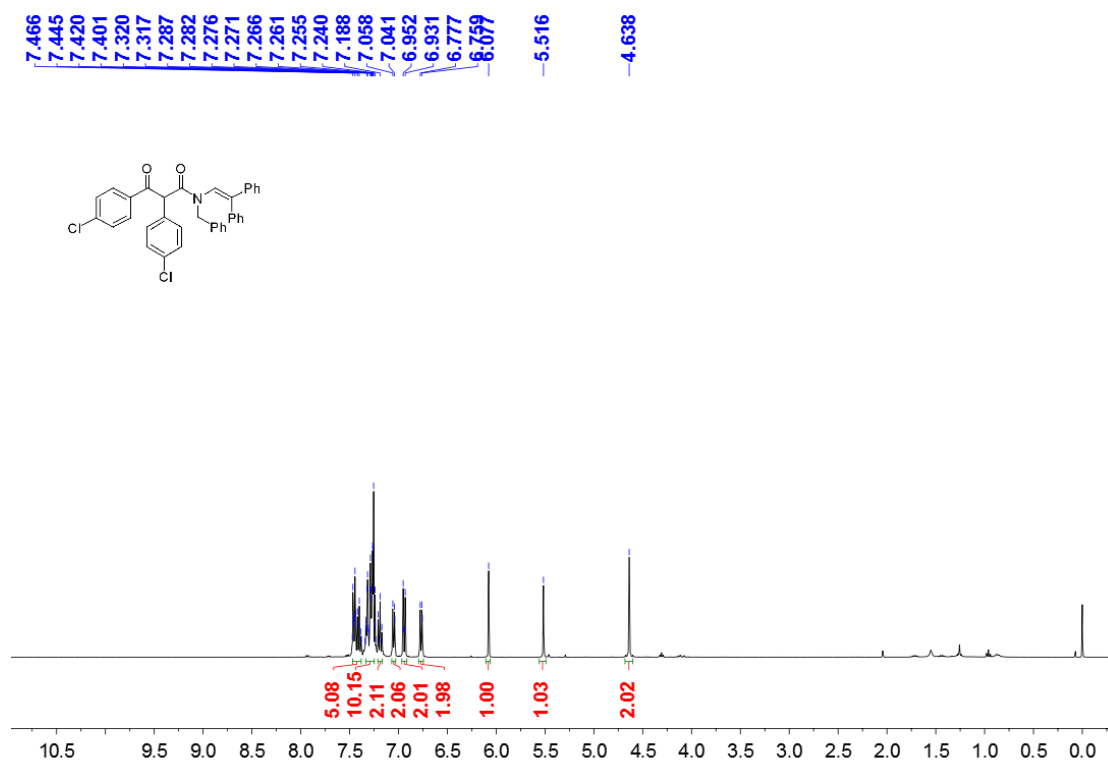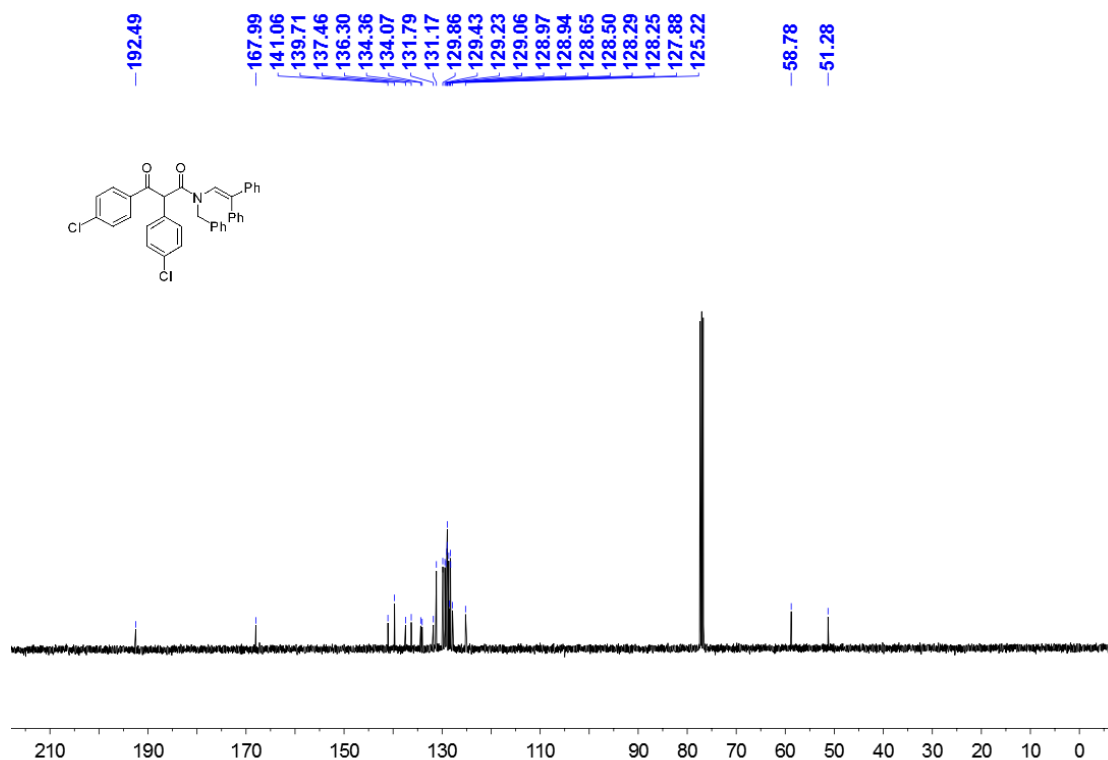

$^1\text{H}$  and  $^{13}\text{C}$  NMR of compound **3ab**

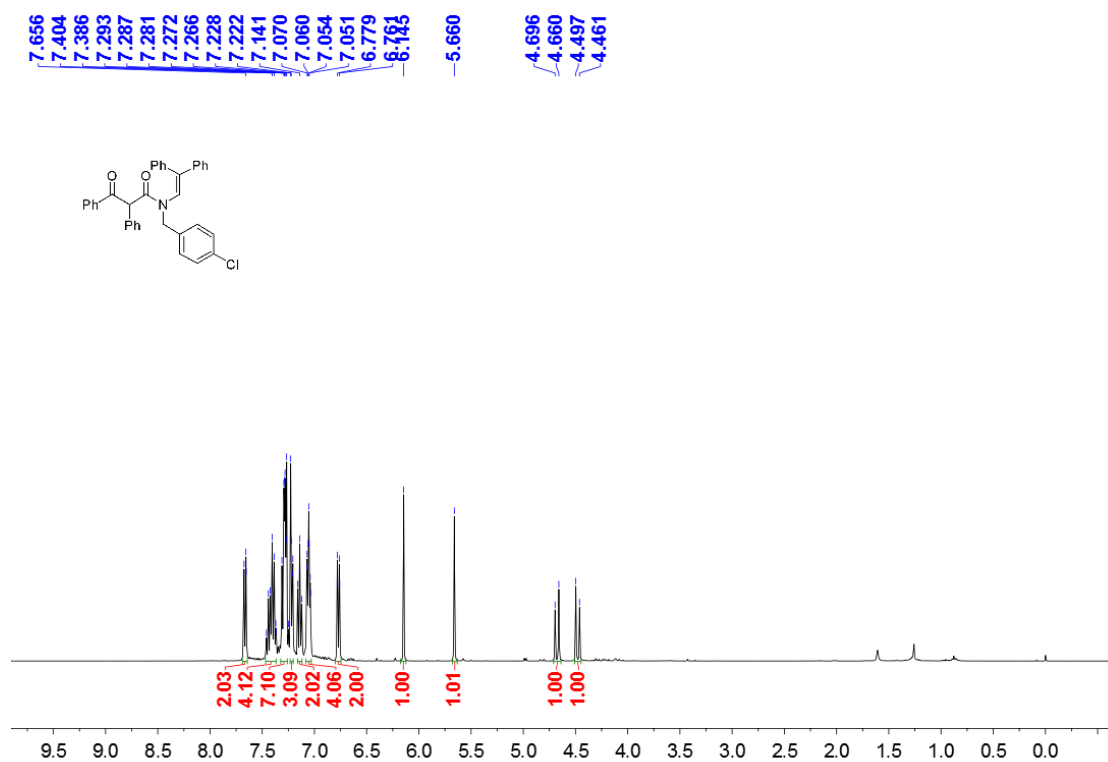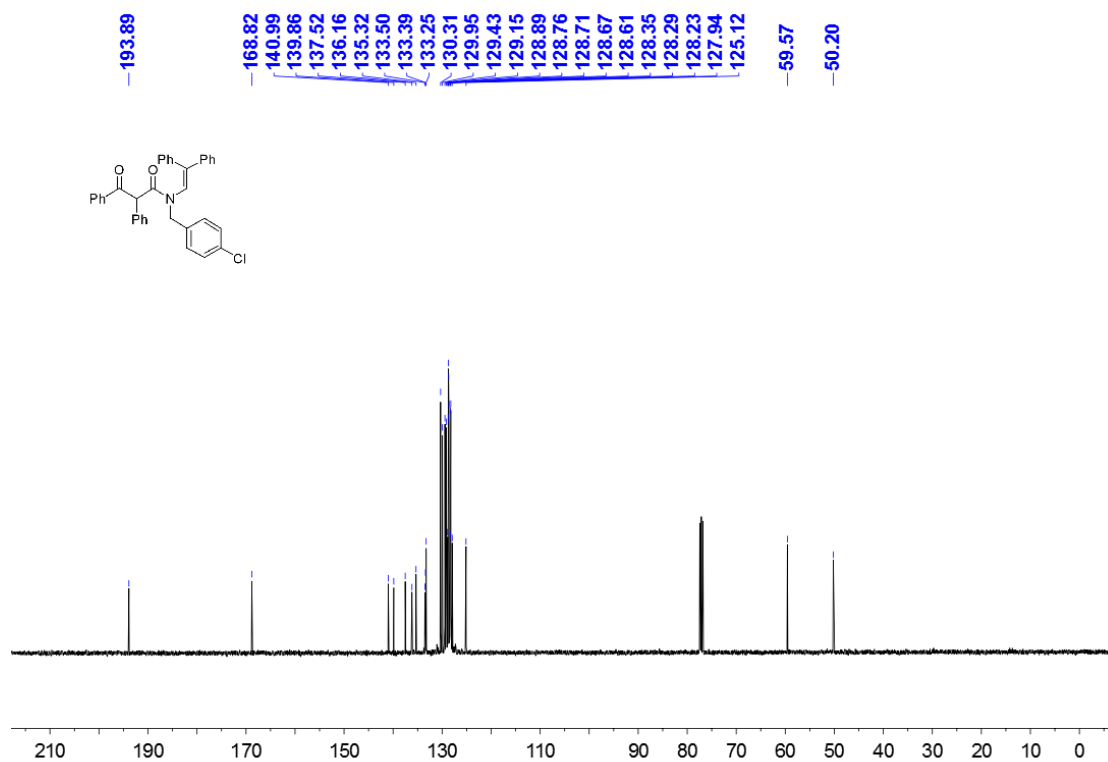

# $^1\text{H}$ and $^{13}\text{C}$ NMR of compound **3bb**

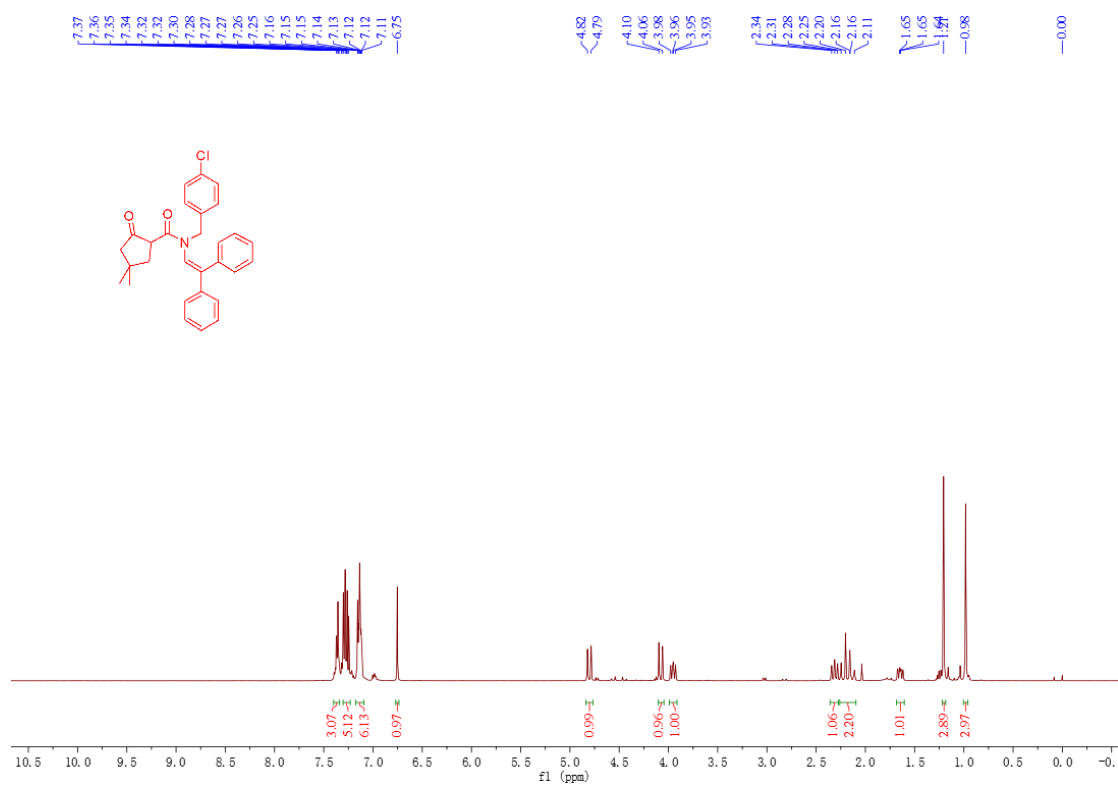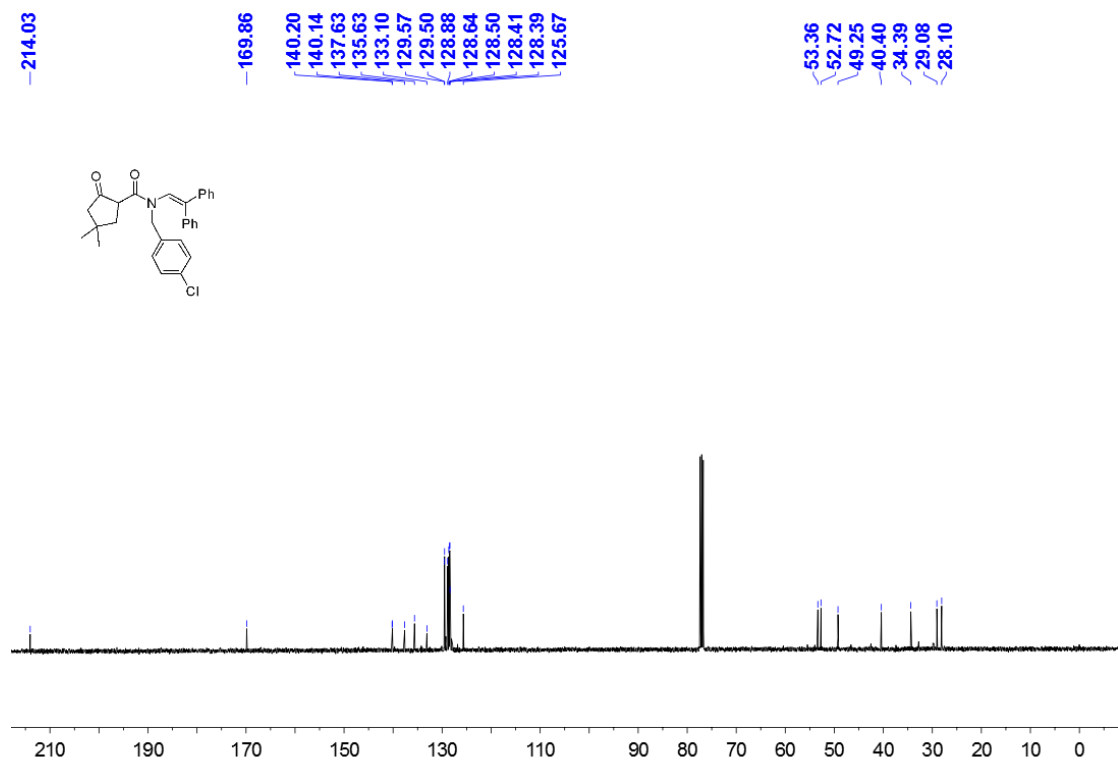

$^1\text{H}$  and  $^{13}\text{C}$  NMR of compound **3ac**

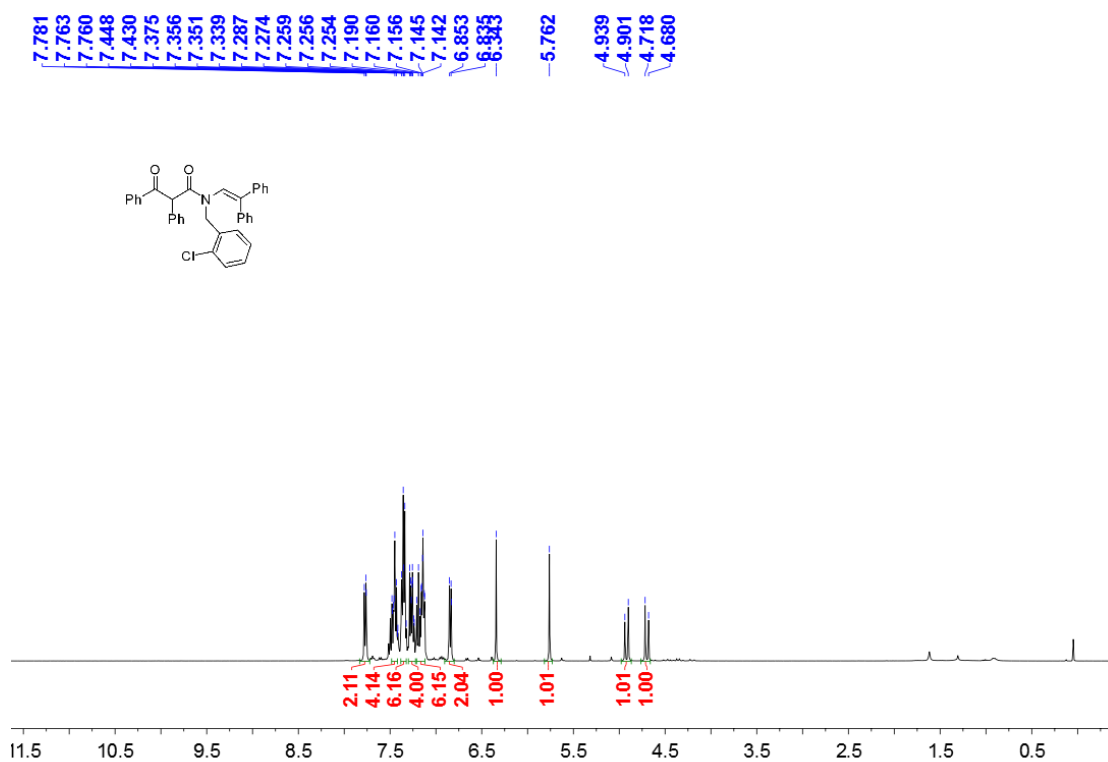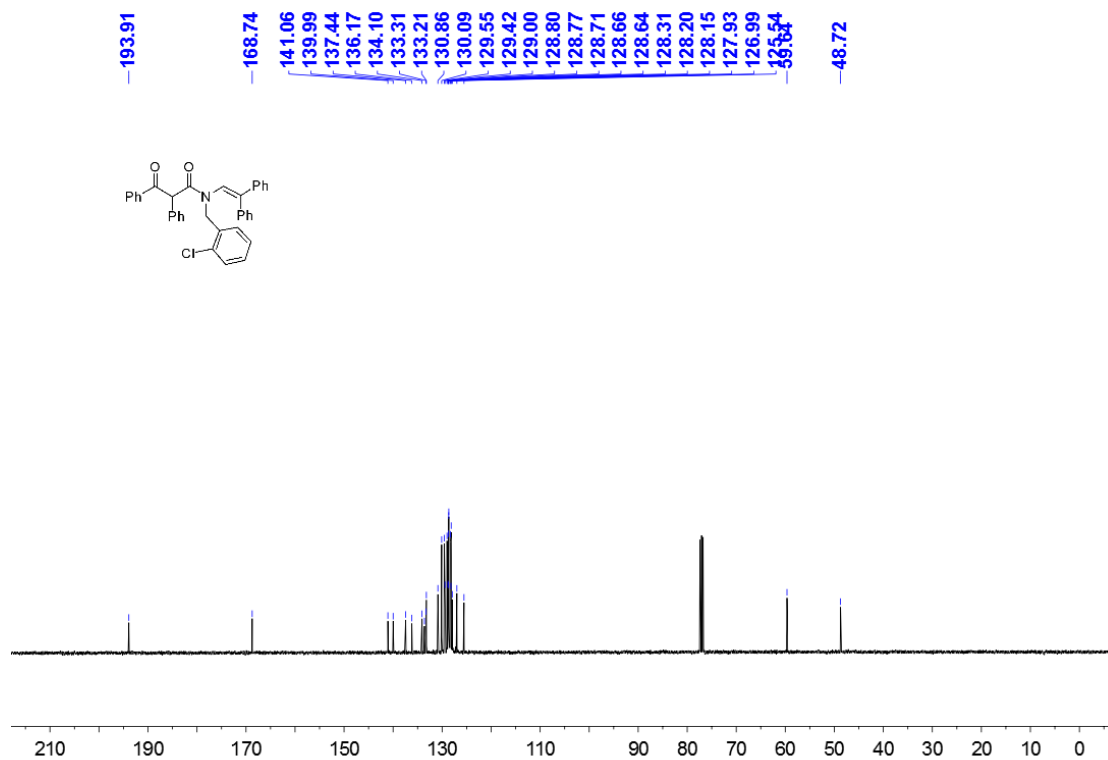

$^1\text{H}$  and  $^{13}\text{C}$  NMR of compound **3bc**

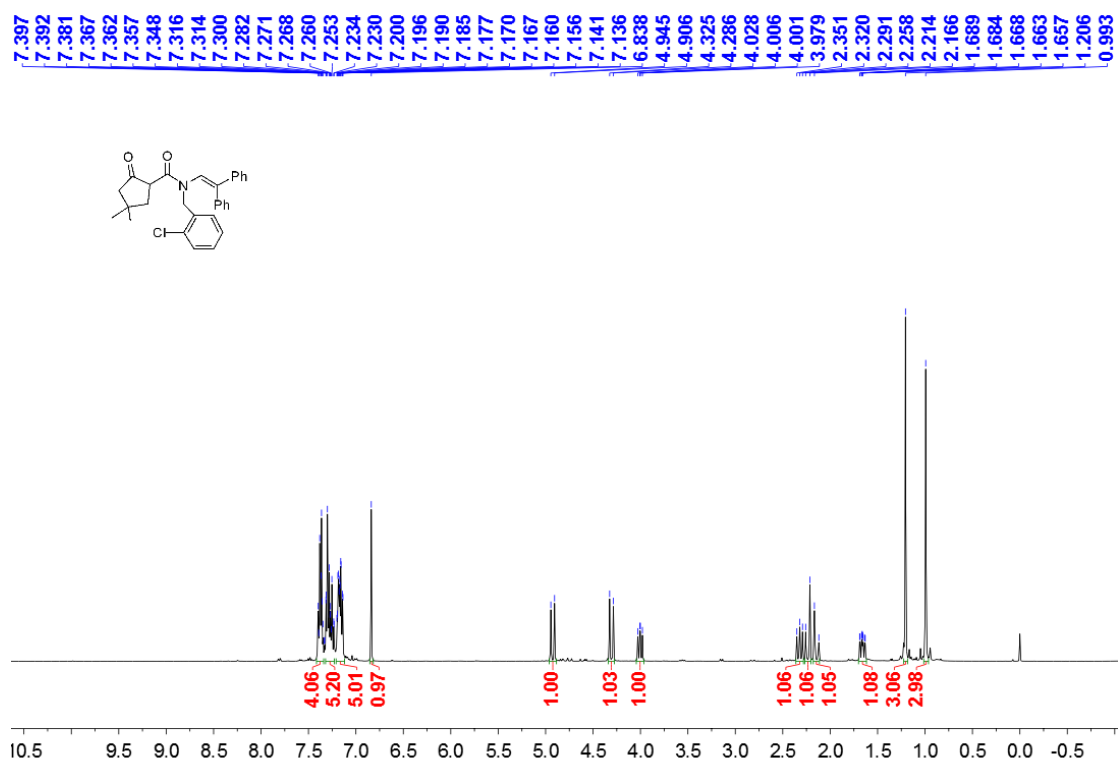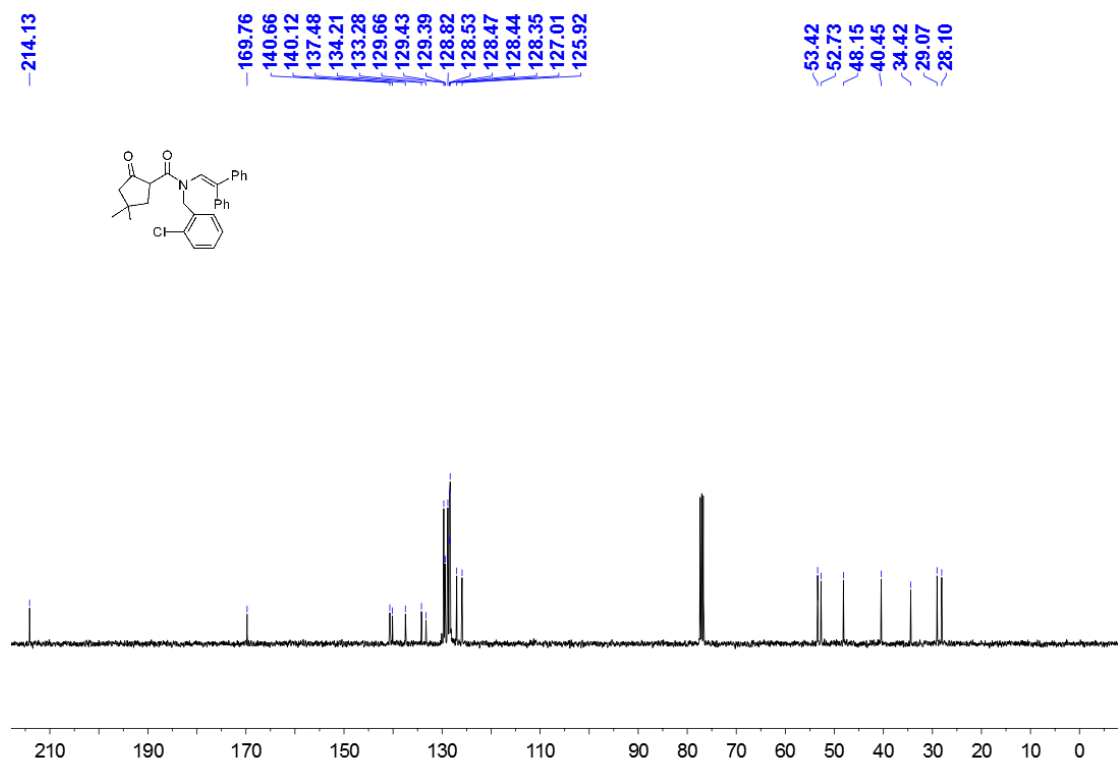

$^1\text{H}$  and  $^{13}\text{C}$  NMR of compound **3ad**

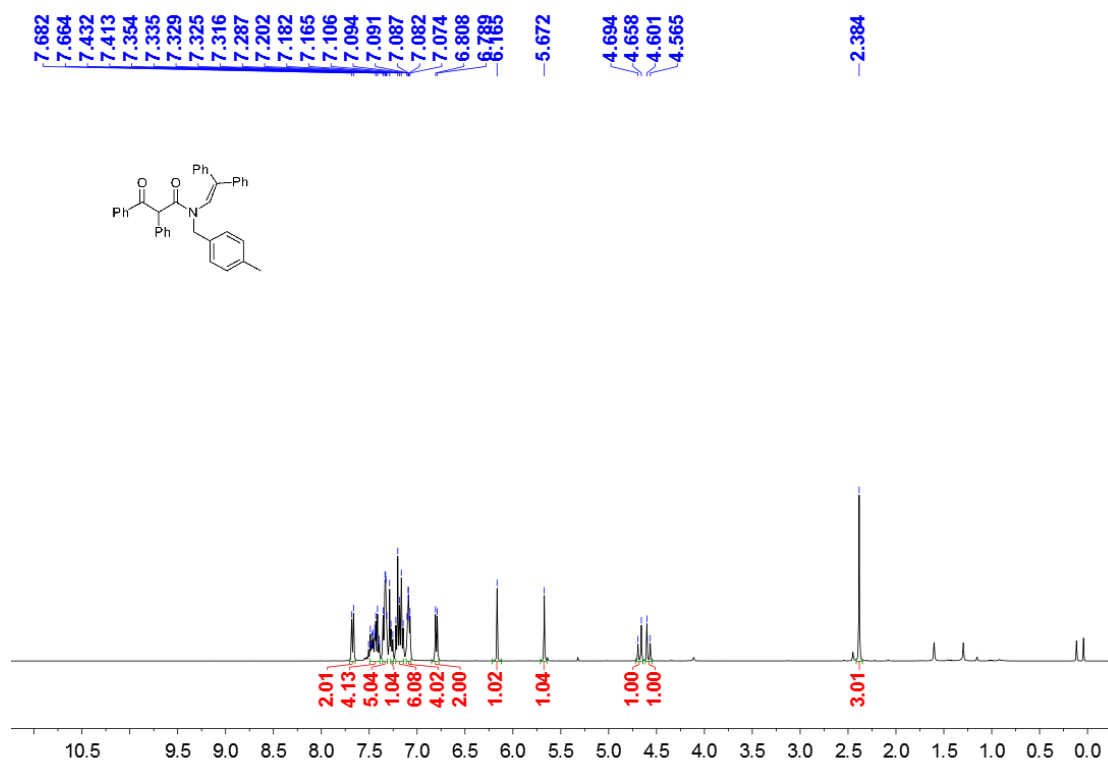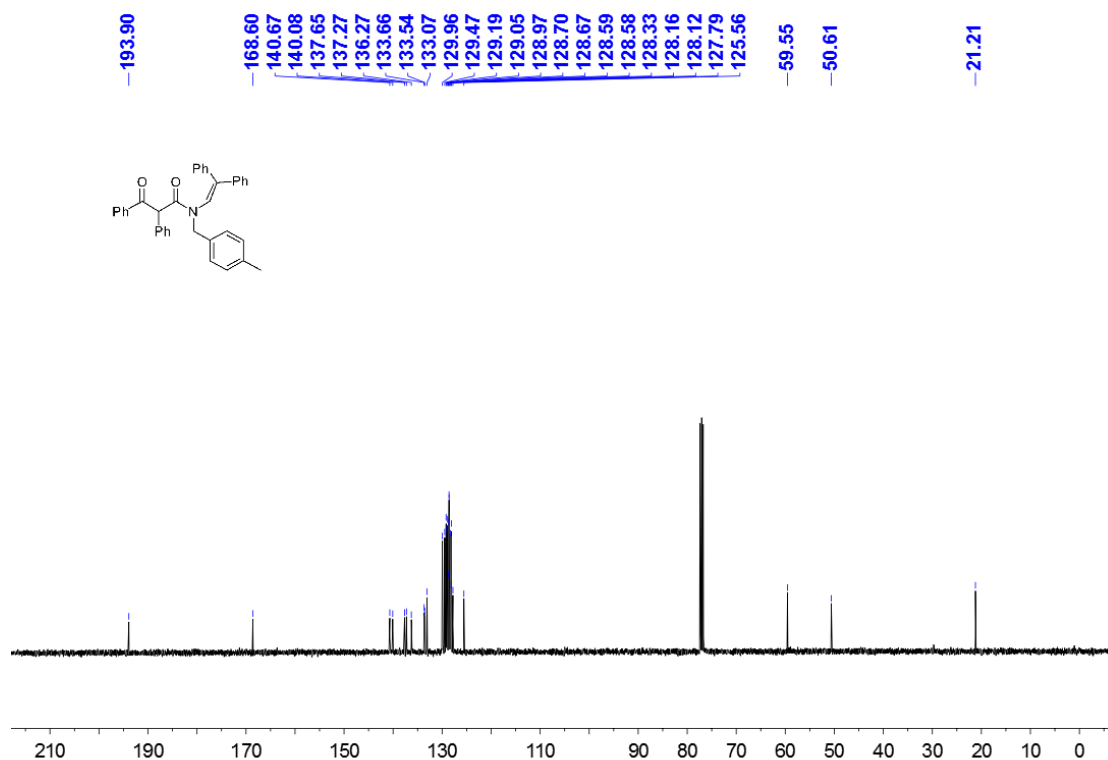

$^1\text{H}$  and  $^{13}\text{C}$  NMR of compound **3bd**

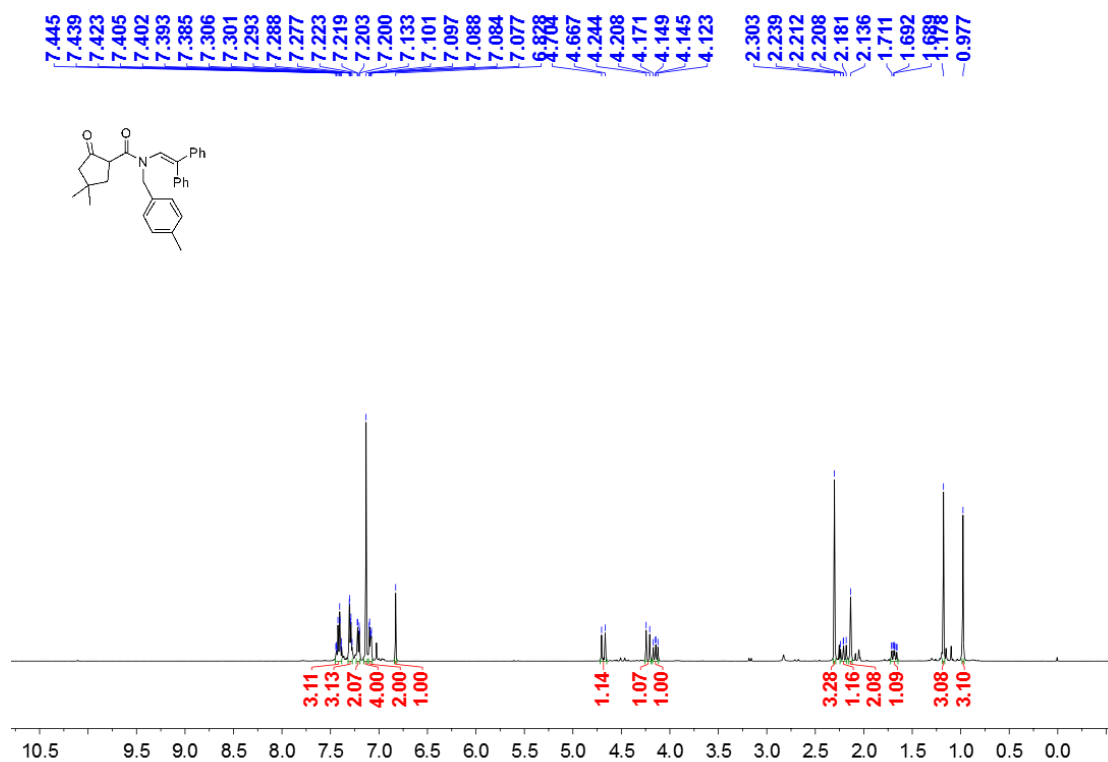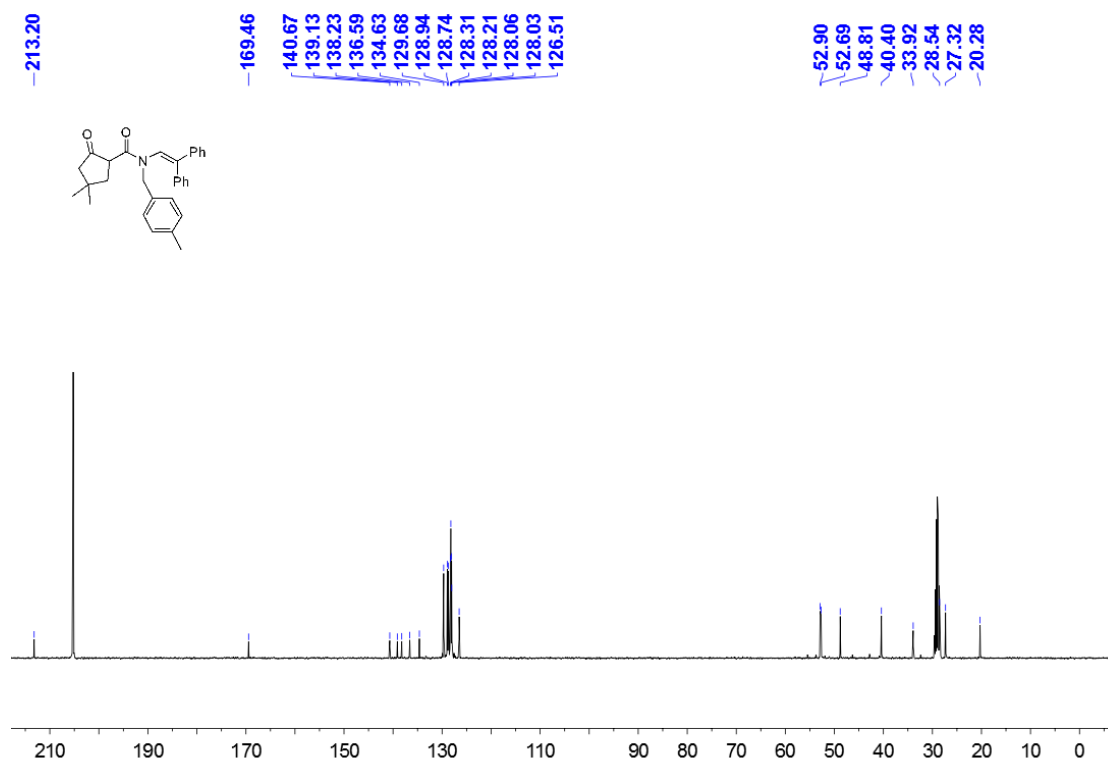

$^1\text{H}$  and  $^{13}\text{C}$  NMR of compound **3ae**

$^1\text{H}$  NMR peaks (ppm): 7.664, 7.646, 7.503, 7.484, 7.477, 7.472, 7.465, 7.464, 7.452, 7.372, 7.353, 7.346, 7.340, 7.321, 7.301, 7.287, 7.283, 7.265, 7.260, 7.248, 7.228, 7.210, 7.131, 7.126, 7.111, 6.911, 6.893, 6.889, 6.293, 5.649, 3.527, 3.513, 3.494, 3.475, 3.453, 3.434, 3.416, 3.401, 1.660, 1.642, 1.623, 1.603, 1.585, 1.336, 1.317, 1.298, 1.280, 0.937, 0.919, 0.900.

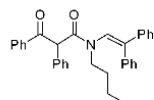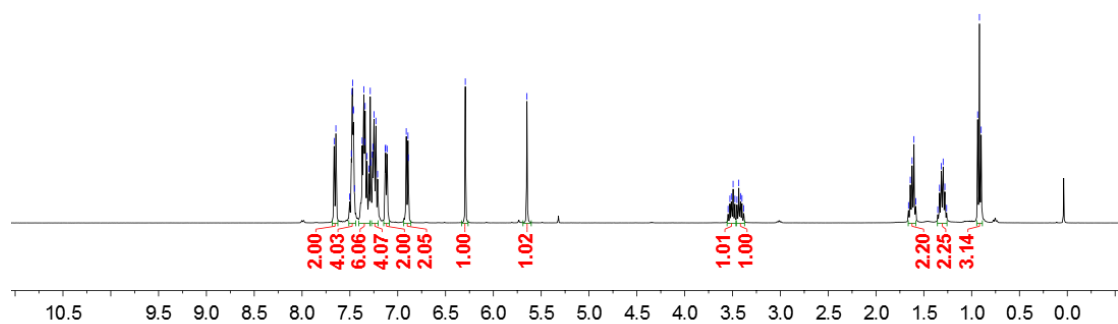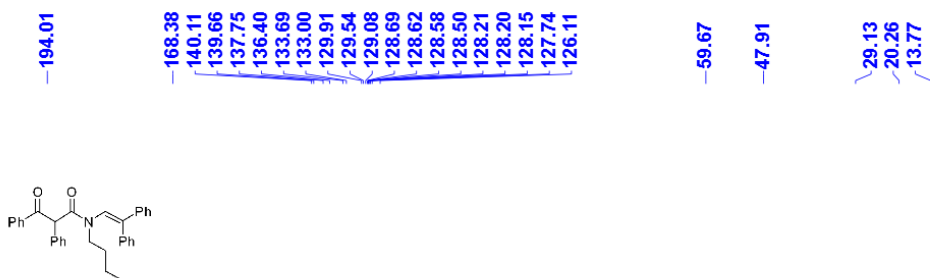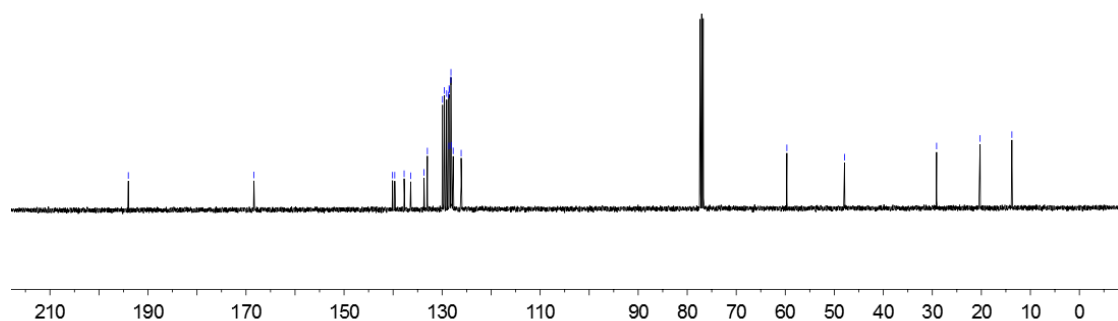

$^1\text{H}$  and  $^{13}\text{C}$  NMR of compound **3be**

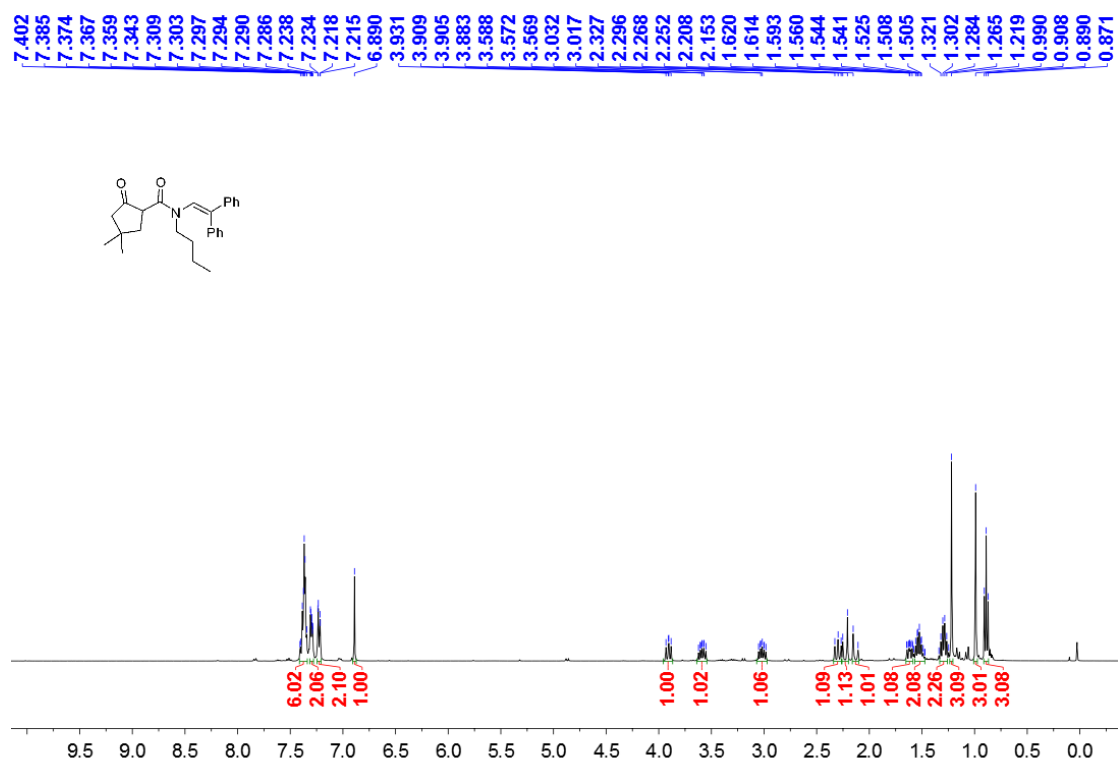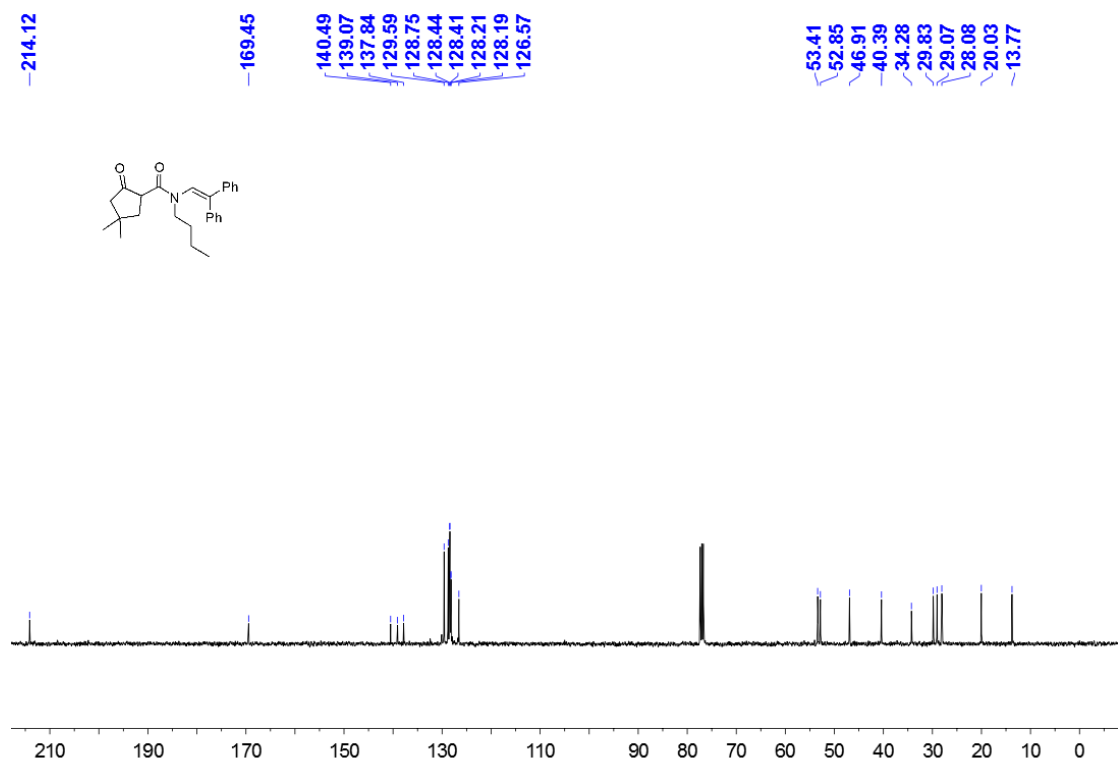

$^1\text{H}$  and  $^{13}\text{C}$  NMR of compound **3af**

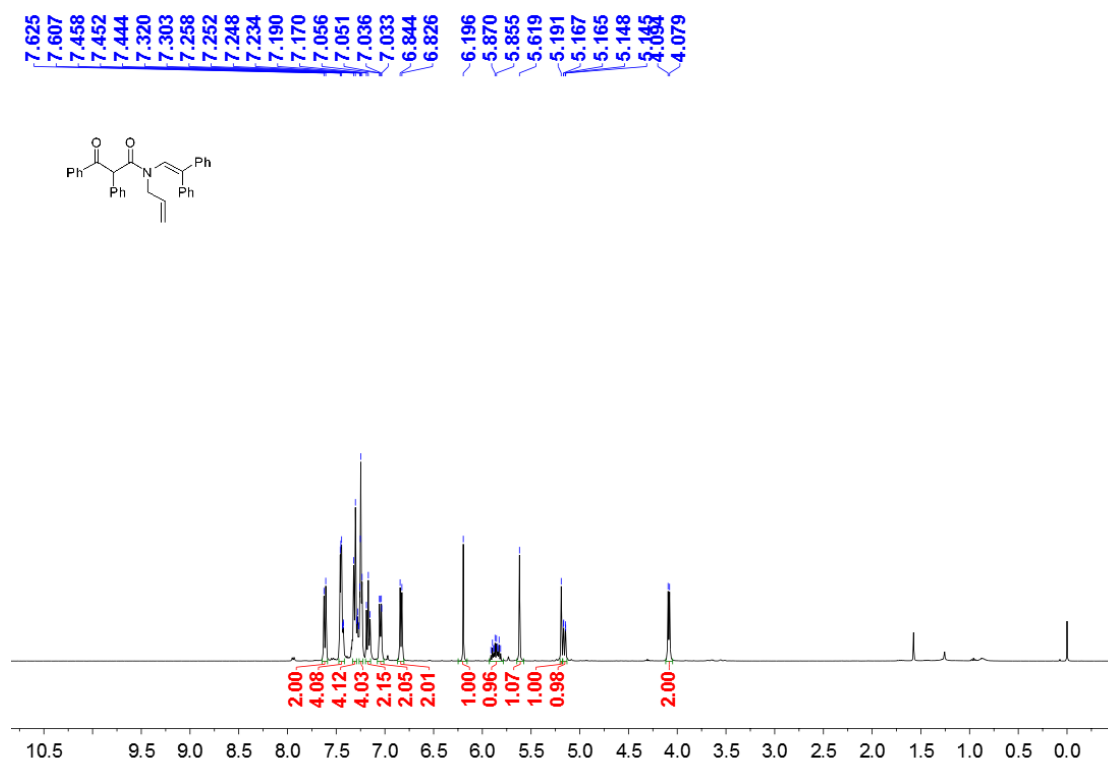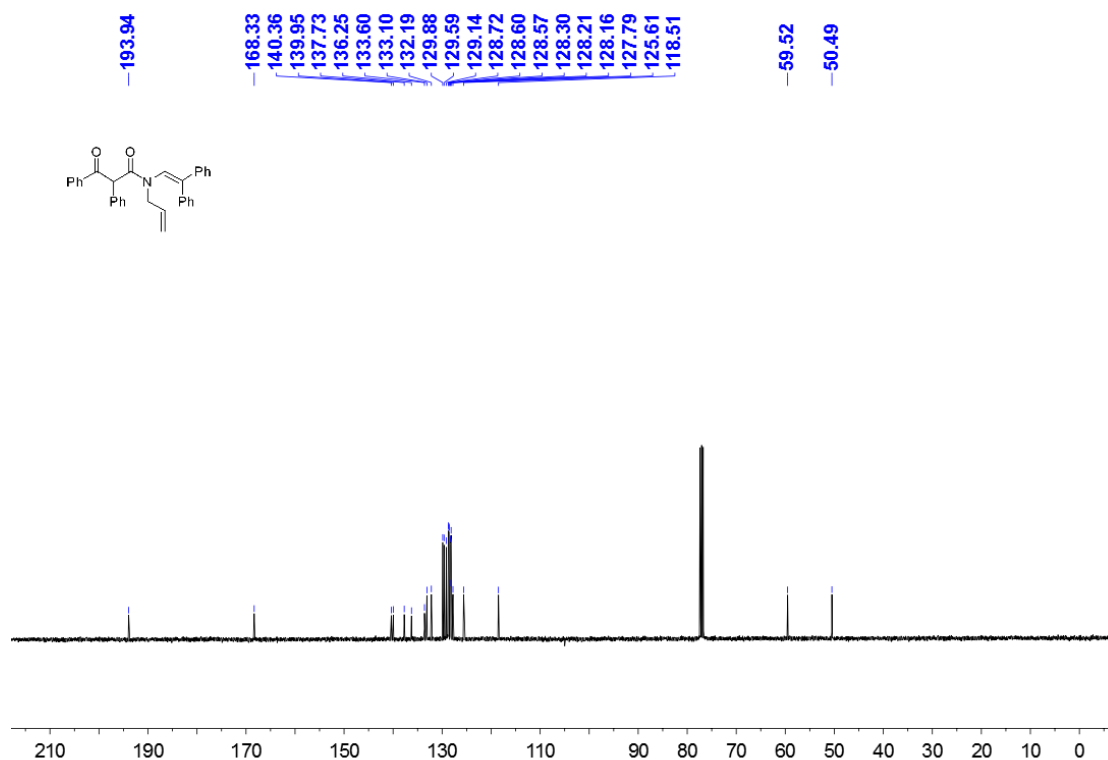

$^1\text{H}$  and  $^{13}\text{C}$  NMR of compound **3bf**

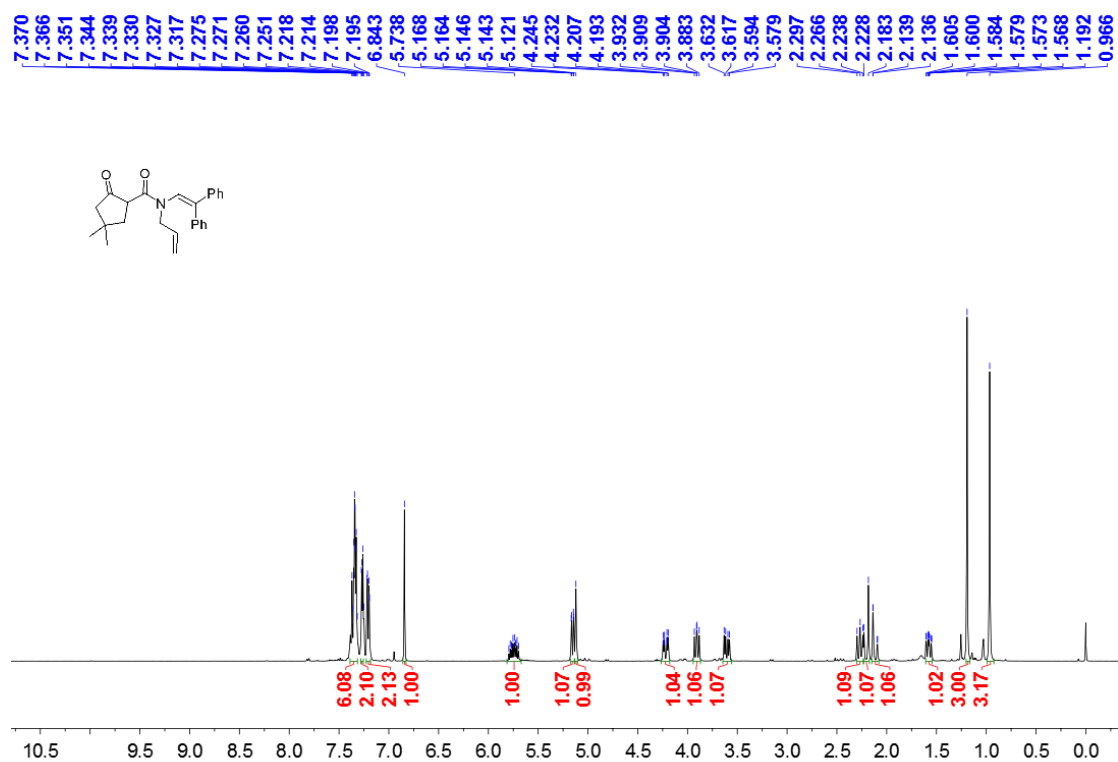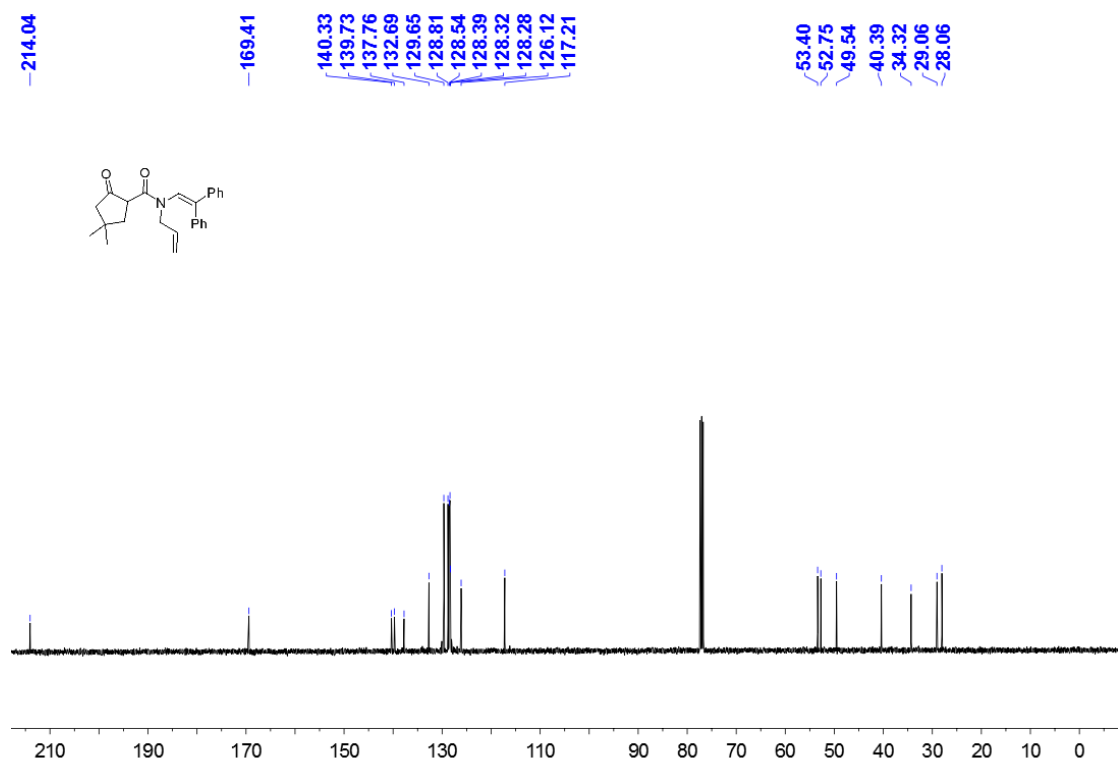

$^1\text{H}$  and  $^{13}\text{C}$  NMR of compound **3ag**

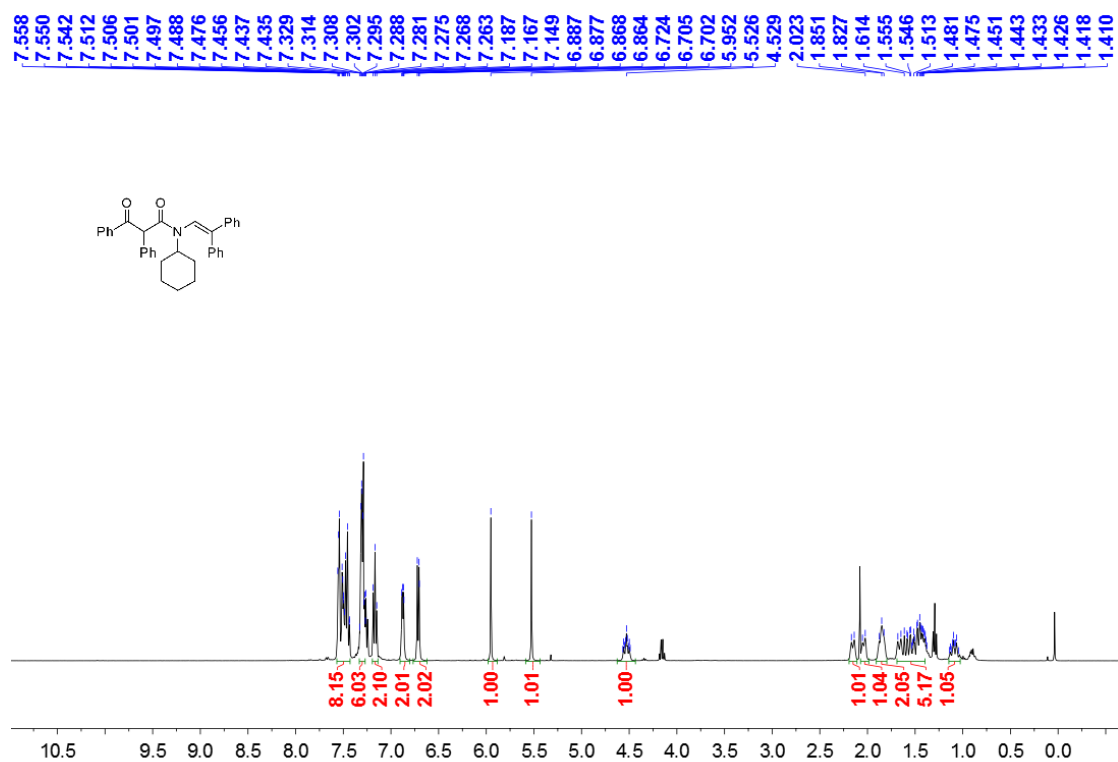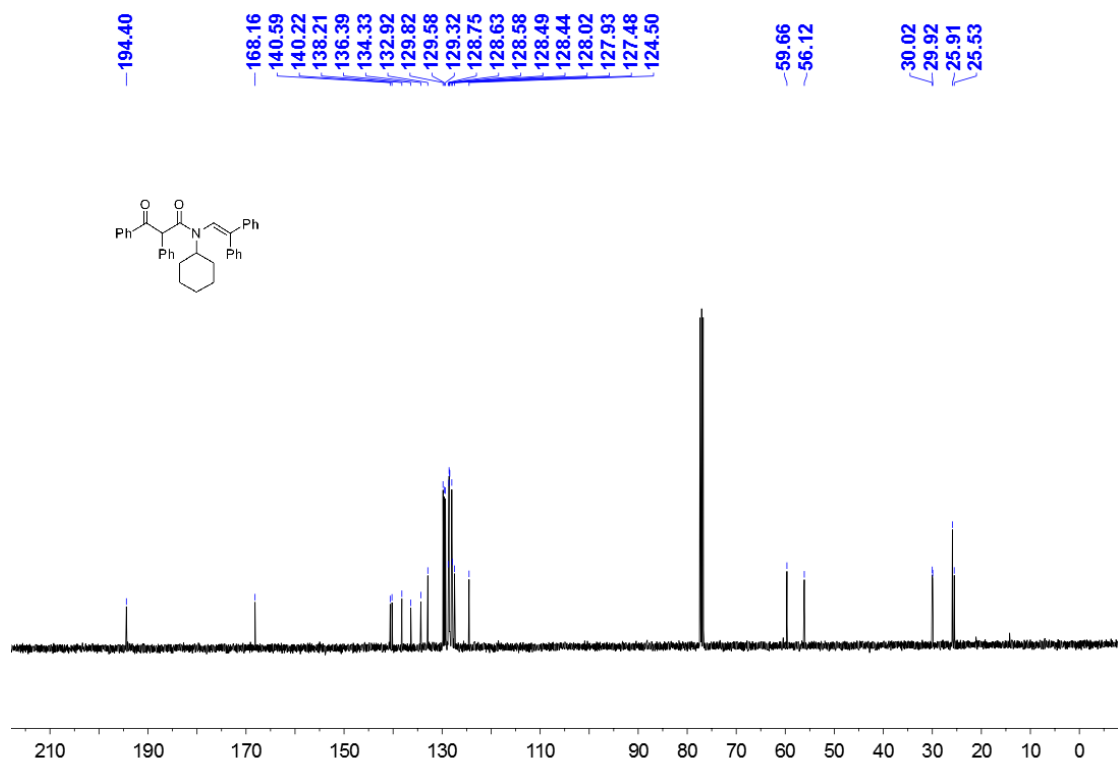

$^1\text{H}$  and  $^{13}\text{C}$  NMR of compound **3bg**

$^1\text{H}$  NMR peaks (ppm): 7.379, 7.371, 7.363, 7.344, 7.338, 7.333, 7.329, 7.316, 7.309, 7.304, 7.300, 7.288, 7.257, 7.253, 7.237, 6.582, 4.419, 3.849, 3.828, 3.821, 3.800, 2.138, 2.093, 2.067, 2.011, 1.981, 1.951, 1.824, 1.798, 1.669, 1.647, 1.639, 1.618, 1.527, 1.496, 1.488, 1.406, 1.397, 1.386, 1.374, 1.364, 1.354, 1.116, 0.919, 0.914, 0.909, 0.903, 0.887, 0.882, 0.849.

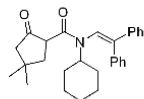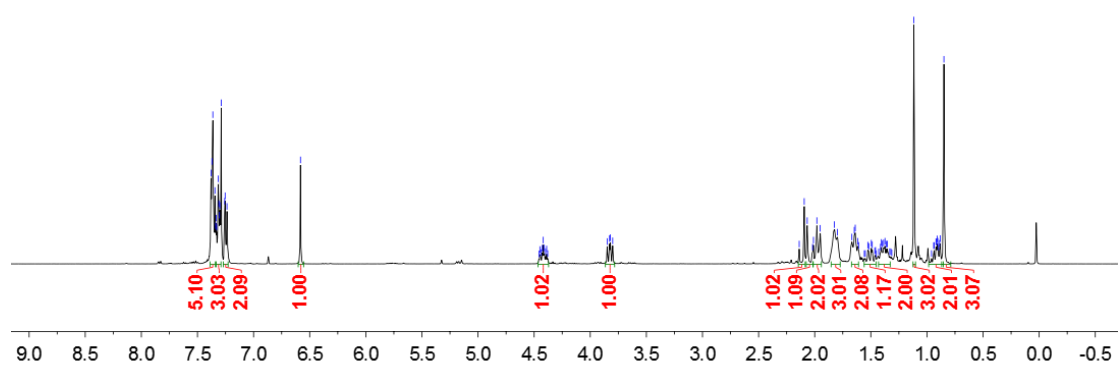

$^{13}\text{C}$  NMR peaks (ppm): 214.09, 168.71, 140.92, 140.35, 137.91, 129.87, 128.69, 128.62, 128.42, 128.12, 128.10, 124.99, 56.15, 53.24, 39.62, 33.93, 31.19, 30.05, 29.00, 27.83, 25.99, 25.86, 25.53.

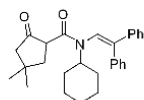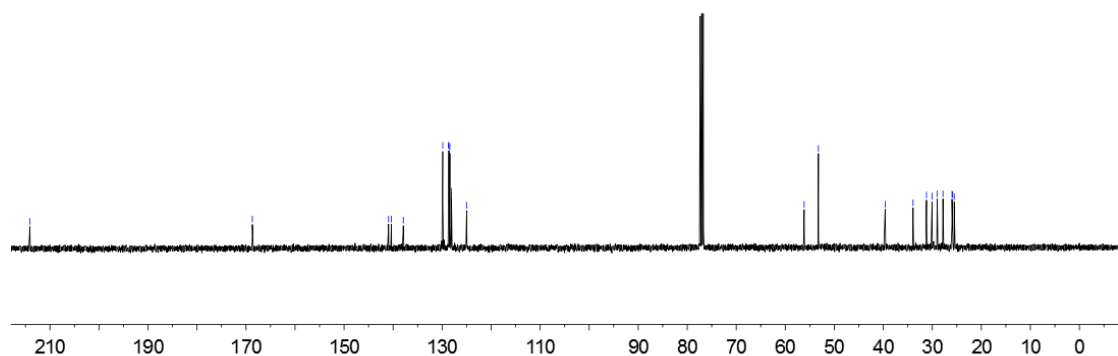

$^1\text{H}$  and  $^{13}\text{C}$  NMR of compound **5**

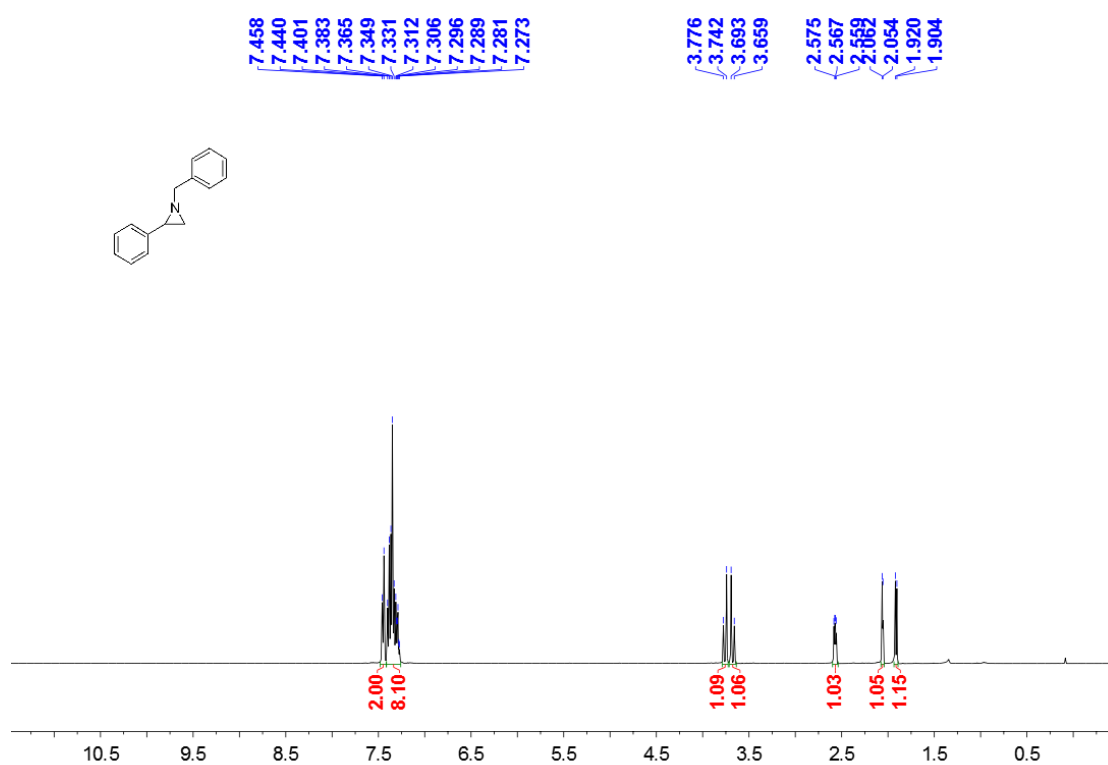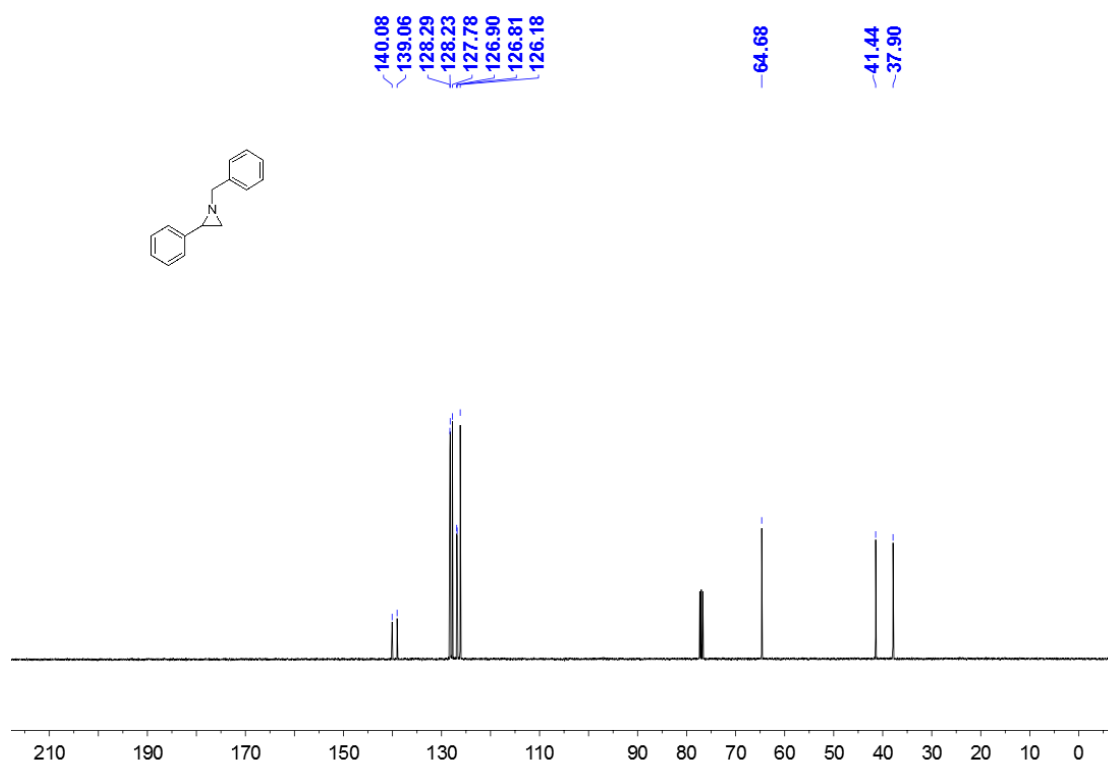

$^1\text{H}$  and  $^{13}\text{C}$  NMR of compound **6**

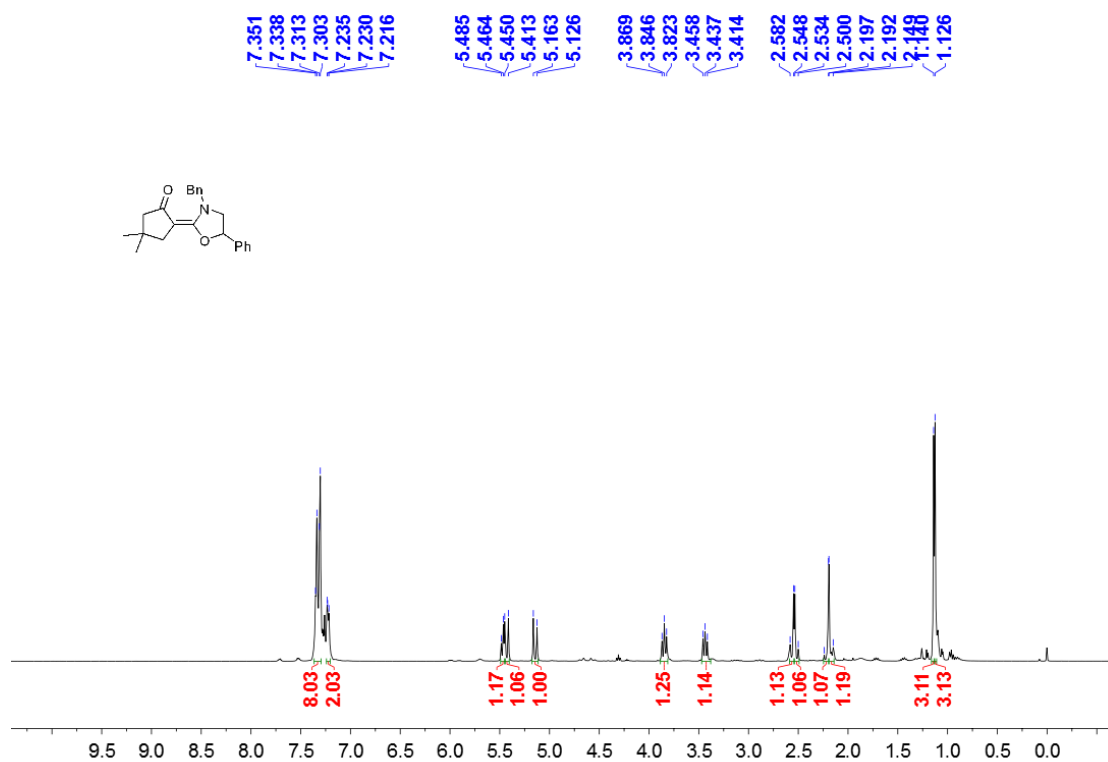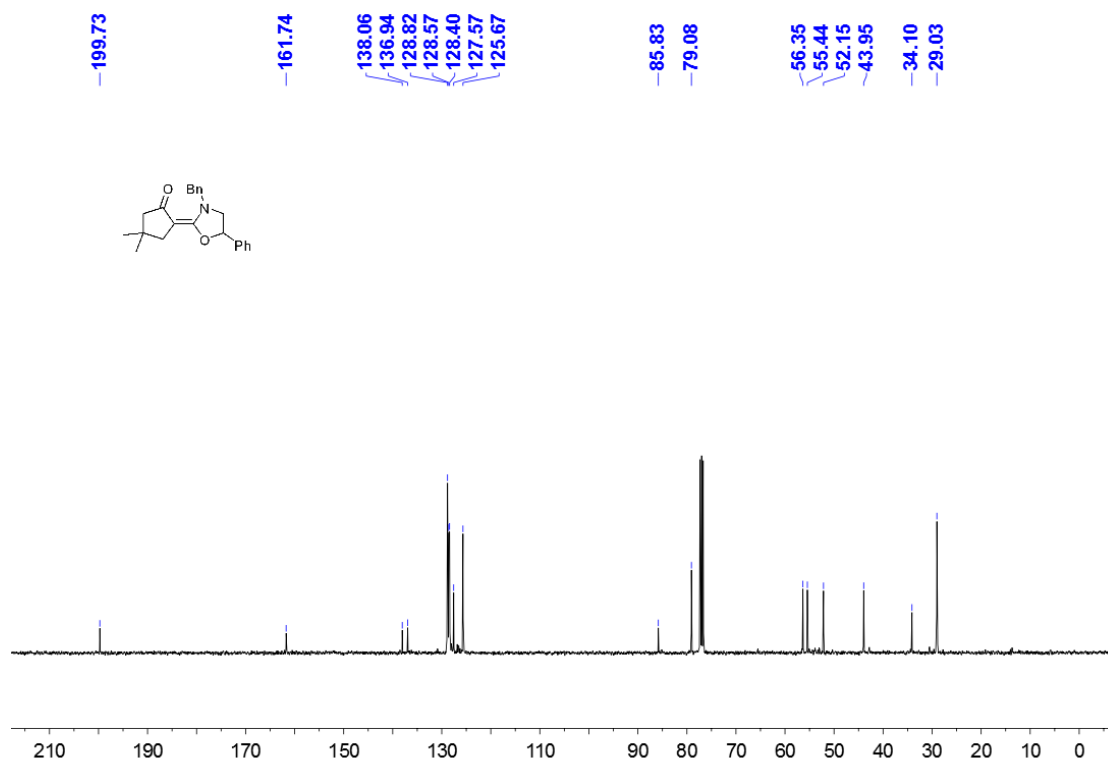

$^1\text{H}$  and  $^{13}\text{C}$  NMR of compound 7

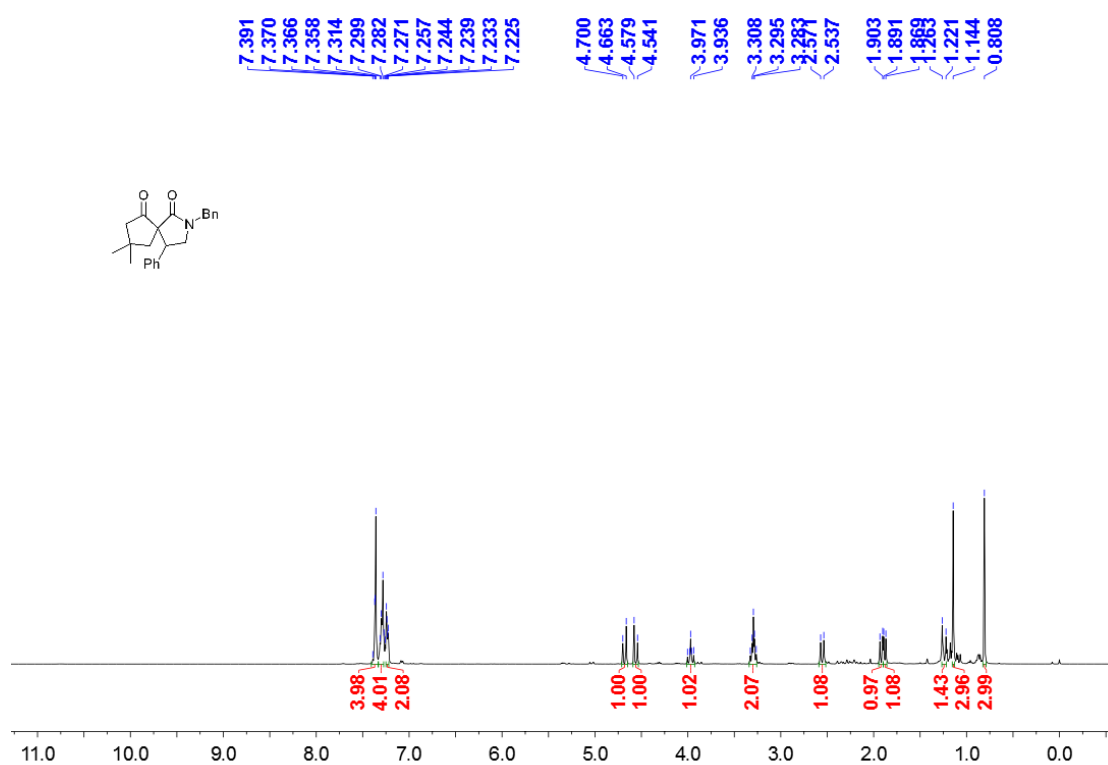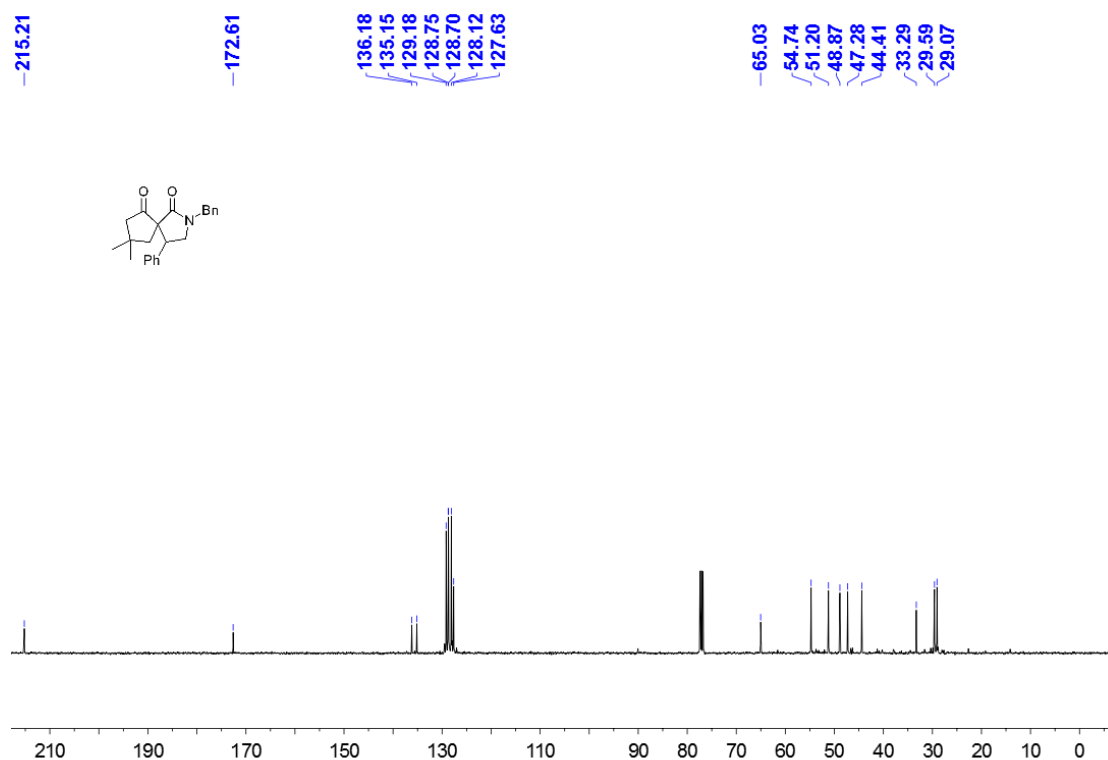

$^1\text{H}$  and  $^{13}\text{C}$  NMR of compound **8**

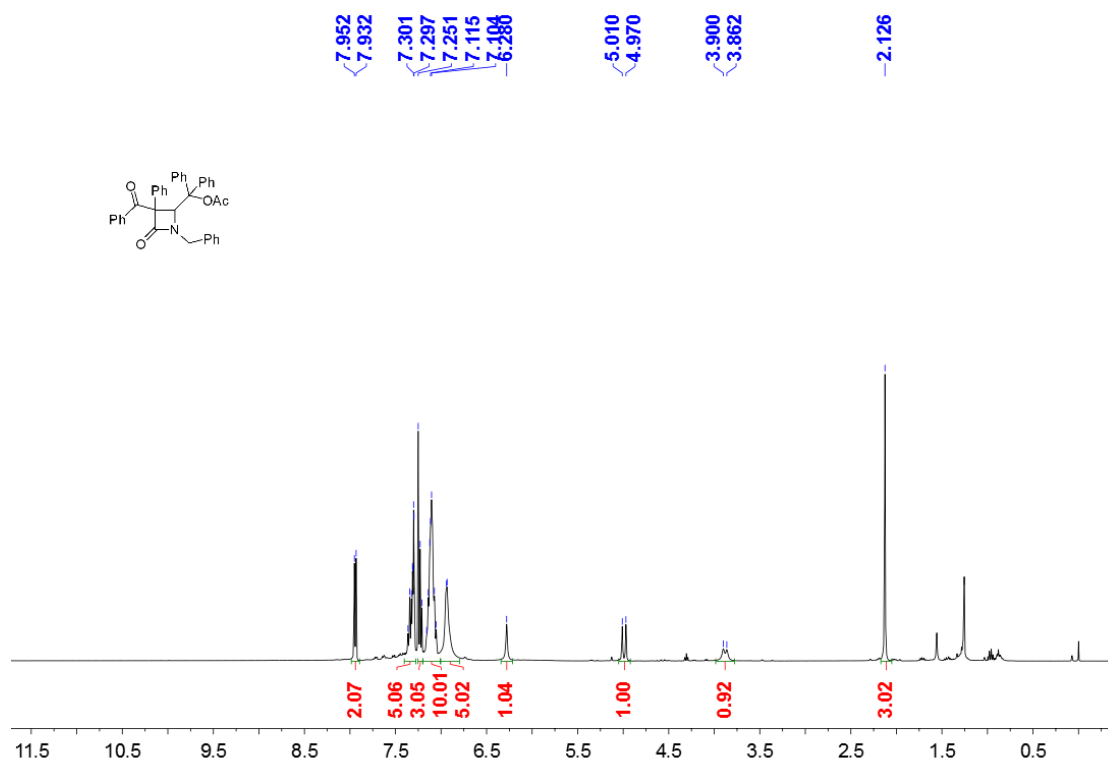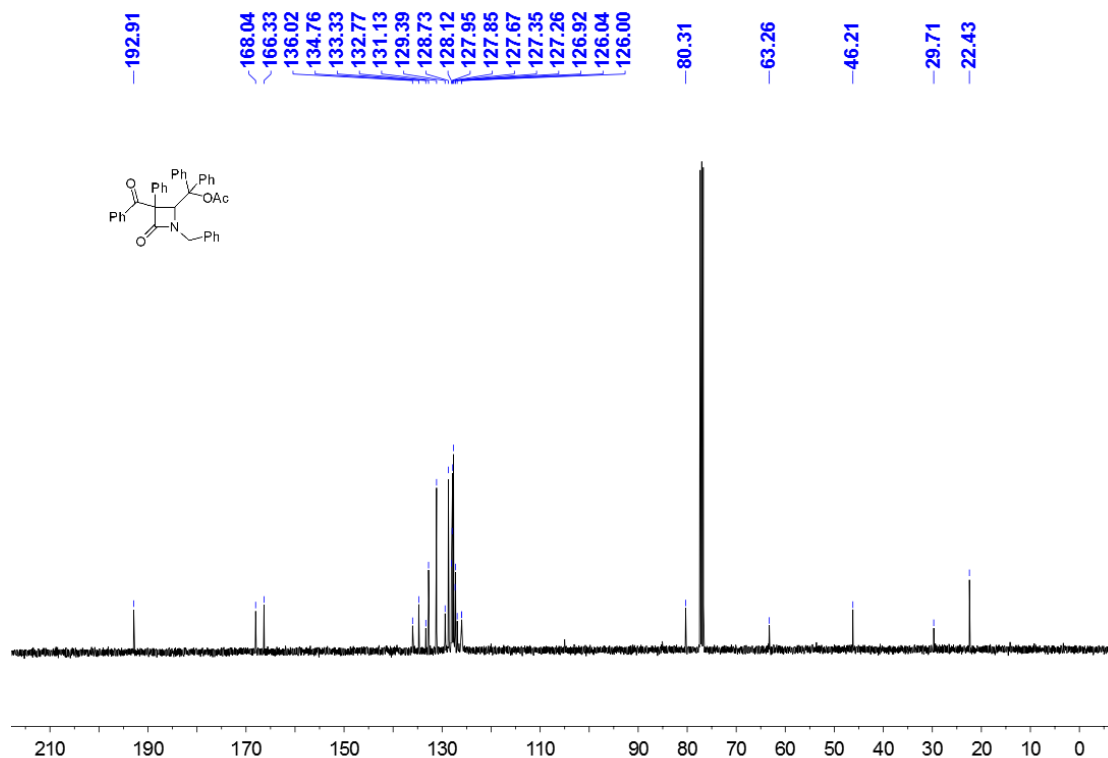

Supplement: d1ob01359a1.pdf [file d1ob01359a1.pdf]
